# Supplementary material for: Physiological Screening for Drought Tolerance Traits in Vegetable Amaranth (Amaranthus tricolor) Germplasm
Source: MDPI journal article supplement (doi:10.3390/agriculture11100994), 2021-10-13
Supplement: s1 [file s1]

## SUPPLEMENTARY MATERIALS

**Figure S1:**

**(a) Scale for leaf wilting scoring (LWS).**

0: leaves healthy, 1: flat, leaves start to fold, 2: V-shaped, 3: U-shaped, 4: O-shaped and 5: leaves tightly fold (O'Toole and Cruz, 1979; Fen et al. 2015).

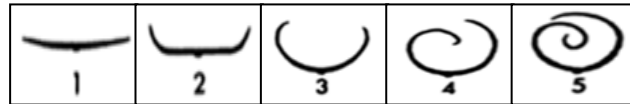

**(b) Scale for drought tolerance symptom (DS).**

0-6 scales for drought scoring (DS) before re-water and 7-10 scales for DS at recovery. Modified scale according to Fen et al. (2015) and De Datta et al. (1988).

| Score | Scoring                                          |             |
|-------|--------------------------------------------------|-------------|
| 0     | No symptoms                                      | Tolerant    |
| 1     | Slight tip drying                                |             |
| 2     | Tip drying extended to 1/4 length in most leaves |             |
| 3     | 1/4 to 1/2 of the leaves fully dried             |             |
| 4     | More than 2/3 of full leaves fully dried         |             |
| 5     | Drooping stem but leaves still pigmented         |             |
| 6     | All plants apparently dead                       | Susceptible |
| 7     | < 5 leaves senescence                            | Tolerant    |
| 8     | < 10 leaves senescence                           |             |
| 9     | > 10 leaves senescence                           |             |
| 10    | Not recover                                      | Susceptible |

**Table S1: (a) Mean of each accession for yield and biomass partitioning under water-sufficient (WS) and water-deficient (WD) in Trial I (n=3) and Trial II (n=4), SD=  $\pm$ standard error of the mean, % CV = % coefficient of variation**

| Entry | Genotype  | Yield   |      |          |       | Leaf fresh weight (g) |      |          |       | Leaf dry weight (g) |      |          |      | Stem fresh weight (g) |      |          |       | Stem dry weight (g) |      |          |      | Total leaf area (TLA, cm <sup>2</sup> ) |        |          |        | Specific leaf area (SLA, cm <sup>2</sup> g <sup>-1</sup> ) |        |          |        |
|-------|-----------|---------|------|----------|-------|-----------------------|------|----------|-------|---------------------|------|----------|------|-----------------------|------|----------|-------|---------------------|------|----------|------|-----------------------------------------|--------|----------|--------|------------------------------------------------------------|--------|----------|--------|
|       |           | Trial I |      | Trial II |       | Trial I               |      | Trial II |       | Trial I             |      | Trial II |      | Trial I               |      | Trial II |       | Trial I             |      | Trial II |      | Trial I                                 |        | Trial II |        | Trial I                                                    |        | Trial II |        |
|       |           | WS      | WD   | WS       | WD    | WS                    | WD   | WS       | WD    | WS                  | WD   | WS       | WD   | WS                    | WD   | WS       | WD    | WS                  | WD   | WS       | WD   | WS                                      | WD     | WS       | WD     | WS                                                         | WD     | WS       | WD     |
| 1     | AV-TRI 2  | 11.14   | 3.09 | 26.76    | 17.88 | 5.90                  | 1.43 | 12.27    | 8.57  | 0.54                | 0.70 | 0.77     | 0.90 | 5.24                  | 1.66 | 14.48    | 9.31  | 0.55                | 0.51 | 1.23     | 1.05 | 200.30                                  | 82.50  | 330.50   | 270.50 | 371.30                                                     | 116.60 | 457.00   | 299.60 |
| 2     | AV-TRI 18 | 18.44   | 5.13 | 68.80    | 38.85 | 9.32                  | 1.89 | 26.66    | 11.25 | 1.41                | 1.04 | 2.91     | 1.89 | 9.12                  | 3.24 | 42.14    | 27.60 | 1.18                | 0.88 | 3.36     | 2.92 | 294.70                                  | 104.30 | 541.70   | 236.50 | 226.70                                                     | 104.60 | 187.20   | 121.20 |
| 3     | AV-TRI 26 | 18.57   | 3.05 | 52.07    | 33.60 | 10.22                 | 1.55 | 24.85    | 16.30 | 1.40                | 1.01 | 3.35     | 3.41 | 8.35                  | 1.50 | 27.23    | 17.30 | 1.07                | 0.53 | 2.79     | 2.58 | 372.20                                  | 134.00 | 795.60   | 634.80 | 267.70                                                     | 132.20 | 238.40   | 183.20 |
| 4     | AV-TRI 33 | 14.44   | 4.15 | 37.07    | 30.46 | 7.32                  | 1.89 | 18.51    | 12.11 | 1.19                | 1.17 | 2.25     | 1.97 | 7.11                  | 2.26 | 18.56    | 18.35 | 1.06                | 0.76 | 3.12     | 1.90 | 167.00                                  | 109.90 | 482.50   | 221.50 | 145.90                                                     | 93.40  | 216.40   | 120.10 |
| 5     | AV-TRI 34 | 12.04   | 5.43 | 47.01    | 29.87 | 6.92                  | 2.76 | 22.40    | 13.52 | 1.01                | 1.17 | 2.05     | 2.03 | 5.12                  | 2.67 | 24.61    | 16.35 | 0.61                | 0.77 | 2.54     | 1.58 | 196.60                                  | 180.20 | 541.40   | 430.90 | 209.70                                                     | 151.10 | 265.10   | 234.20 |
| 6     | AV-TRI 39 | 15.59   | 3.89 | 42.56    | 34.37 | 9.13                  | 1.96 | 21.52    | 12.81 | 1.05                | 1.11 | 2.21     | 1.91 | 6.46                  | 1.93 | 21.04    | 21.55 | 0.67                | 0.47 | 2.01     | 2.36 | 307.50                                  | 134.40 | 671.20   | 325.10 | 295.90                                                     | 119.70 | 305.40   | 187.50 |
| 7     | AV-TRI 40 | 16.68   | 3.94 | 41.78    | 30.32 | 9.81                  | 1.48 | 19.31    | 10.01 | 1.18                | 0.95 | 1.83     | 1.37 | 6.87                  | 2.46 | 22.47    | 20.31 | 0.87                | 0.81 | 1.67     | 2.08 | 301.90                                  | 104.50 | 612.40   | 206.60 | 264.00                                                     | 111.20 | 336.40   | 170.70 |
| 8     | AV-TRI 44 | 21.74   | 5.60 | 58.23    | 37.96 | 13.21                 | 2.67 | 25.21    | 13.45 | 1.26                | 1.61 | 3.00     | 1.79 | 8.53                  | 2.93 | 33.02    | 24.51 | 1.26                | 0.83 | 3.33     | 2.85 | 360.50                                  | 199.90 | 582.30   | 318.00 | 315.50                                                     | 124.80 | 198.20   | 186.20 |
| 9     | AV-TRI 49 | 18.33   | 5.79 | 49.57    | 37.32 | 8.70                  | 2.35 | 22.20    | 15.84 | 1.25                | 1.51 | 3.34     | 3.08 | 9.63                  | 3.45 | 27.37    | 21.48 | 1.35                | 0.97 | 2.70     | 3.21 | 283.10                                  | 189.50 | 688.40   | 580.10 | 228.50                                                     | 124.30 | 206.30   | 186.40 |
| 10    | AV-TRI 51 | 18.41   | 4.15 | 44.24    | 33.86 | 10.78                 | 1.81 | 19.25    | 11.67 | 1.10                | 1.24 | 2.15     | 1.90 | 7.63                  | 2.35 | 24.99    | 22.20 | 0.99                | 0.75 | 2.38     | 2.75 | 286.70                                  | 143.30 | 403.90   | 359.80 | 255.80                                                     | 110.30 | 189.40   | 202.70 |
| 11    | AV-TRI 53 | 18.95   | 4.21 | 38.93    | 24.53 | 8.79                  | 1.49 | 16.04    | 6.99  | 1.26                | 0.99 | 1.93     | 1.06 | 10.16                 | 2.71 | 22.89    | 17.55 | 1.29                | 0.91 | 2.51     | 1.90 | 270.90                                  | 102.70 | 250.70   | 237.40 | 218.50                                                     | 104.00 | 136.90   | 236.30 |
| 12    | AV-TRI 54 | 19.76   | 5.34 | 44.77    | 31.95 | 9.18                  | 2.07 | 13.67    | 10.51 | 1.31                | 1.31 | 1.74     | 1.37 | 10.58                 | 3.26 | 31.10    | 21.44 | 1.29                | 0.97 | 2.81     | 3.00 | 272.00                                  | 138.10 | 327.10   | 290.10 | 207.80                                                     | 103.20 | 193.30   | 209.40 |
| 13    | AV-TRI 56 | 12.09   | 4.16 | 45.12    | 28.74 | 6.21                  | 1.73 | 19.02    | 11.73 | 0.82                | 1.13 | 2.28     | 1.45 | 5.88                  | 2.43 | 26.11    | 17.01 | 0.87                | 0.85 | 3.02     | 2.04 | 180.40                                  | 128.70 | 589.60   | 384.90 | 222.20                                                     | 108.60 | 261.60   | 290.90 |
| 14    | AV-TRI 57 | 15.90   | 4.10 | 64.25    | 29.60 | 9.44                  | 2.26 | 30.17    | 11.01 | 1.25                | 1.62 | 3.20     | 2.01 | 6.46                  | 1.84 | 34.08    | 18.59 | 0.83                | 0.58 | 3.06     | 2.36 | 258.40                                  | 176.50 | 845.50   | 370.00 | 202.20                                                     | 111.40 | 268.90   | 193.20 |
| 15    | AV-TRI 58 | 15.60   | 3.81 | 47.83    | 35.62 | 9.45                  | 2.04 | 26.52    | 19.11 | 1.26                | 1.23 | 2.70     | 2.50 | 6.15                  | 1.77 | 21.31    | 16.51 | 0.71                | 0.58 | 1.90     | 1.54 | 274.60                                  | 147.10 | 738.70   | 600.00 | 225.50                                                     | 119.90 | 275.70   | 242.90 |
| 16    | AV-TRI 68 | 11.74   | 4.98 | 46.97    | 36.95 | 6.72                  | 2.21 | 25.00    | 22.99 | 1.24                | 1.30 | 2.51     | 2.33 | 5.02                  | 2.77 | 21.96    | 13.96 | 0.84                | 1.00 | 1.94     | 1.10 | 261.00                                  | 119.40 | 743.30   | 447.40 | 214.30                                                     | 96.40  | 329.50   | 192.60 |
| 17    | AV-TRI 69 | 15.11   | 3.86 | 47.43    | 22.05 | 11.32                 | 2.10 | 33.53    | 14.09 | 1.21                | 1.06 | 2.45     | 1.88 | 3.79                  | 1.76 | 13.90    | 7.96  | 0.47                | 0.59 | 1.47     | 1.05 | 334.60                                  | 139.60 | 1027.80  | 377.10 | 277.90                                                     | 146.00 | 447.90   | 210.30 |
| 18    | AV-TRI 3  | 15.58   | 5.79 | 64.84    | 47.90 | 8.34                  | 2.55 | 28.68    | 20.20 | 1.23                | 1.08 | 2.78     | 2.19 | 7.23                  | 3.24 | 36.16    | 27.70 | 1.06                | 0.76 | 2.47     | 2.37 | 259.80                                  | 183.90 | 771.40   | 591.90 | 211.20                                                     | 170.40 | 282.10   | 289.30 |
| 19    | AV-TRI 11 | 26.47   | 5.24 | 61.29    | 42.96 | 9.14                  | 1.38 | 17.59    | 12.68 | 1.10                | 0.78 | 1.63     | 1.10 | 17.33                 | 3.86 | 43.70    | 30.28 | 1.84                | 0.97 | 3.04     | 2.67 | 269.60                                  | 79.60  | 344.90   | 195.00 | 246.70                                                     | 102.20 | 218.50   | 180.40 |
| 20    | AV-TRI 24 | 12.64   | 5.51 | 54.51    | 41.72 | 5.53                  | 1.99 | 26.11    | 15.56 | 1.00                | 1.36 | 2.77     | 2.10 | 7.11                  | 3.52 | 28.41    | 26.16 | 1.14                | 1.46 | 2.62     | 2.80 | 200.10                                  | 112.50 | 756.90   | 476.00 | 198.60                                                     | 80.10  | 296.60   | 223.70 |
| 21    | AV-TRI 31 | 14.68   | 2.98 | 46.12    | 38.40 | 9.41                  | 1.34 | 25.10    | 21.12 | 1.16                | 0.90 | 2.08     | 2.54 | 5.27                  | 1.65 | 21.02    | 17.29 | 0.78                | 0.58 | 1.96     | 2.05 | 353.20                                  | 127.70 | 980.00   | 652.20 | 307.50                                                     | 142.60 | 517.30   | 252.50 |
| 24    | US-TRI 3  | 16.34   | 4.28 | 33.58    | 25.65 | 6.36                  | 1.03 | 14.50    | 11.41 | 0.91                | 0.69 | 1.33     | 0.98 | 9.98                  | 3.25 | 19.08    | 14.24 | 1.25                | 1.16 | 1.77     | 1.47 | 220.10                                  | 69.50  | 437.20   | 342.30 | 274.10                                                     | 109.40 | 402.40   | 392.00 |
| 25    | US-TRI 6  | 8.12    | 1.72 | 19.91    | 20.17 | 1.67                  | 0.20 | 3.96     | 3.23  | 0.20                | 0.13 | 0.28     | 0.41 | 6.45                  | 1.52 | 15.95    | 16.93 | 0.56                | 0.46 | 0.84     | 0.62 | 33.00                                   | 12.20  | 120.00   | 85.00  | 177.80                                                     | 91.90  | 706.50   | 278.80 |
| 26    | US-TRI 13 | 16.32   | 4.22 | 44.86    | 26.86 | 10.37                 | 2.58 | 24.73    | 13.29 | 1.24                | 1.09 | 2.55     | 2.31 | 5.95                  | 1.64 | 20.13    | 13.56 | 0.57                | 0.40 | 1.56     | 1.38 | 317.20                                  | 155.50 | 440.20   | 400.00 | 265.60                                                     | 140.90 | 175.90   | 211.20 |
| 27    | US-TRI 14 | 11.95   | 4.02 | 36.94    | 34.87 | 5.58                  | 1.42 | 15.06    | 14.63 | 0.84                | 1.02 | 1.71     | 1.54 | 6.37                  | 2.61 | 21.88    | 20.24 | 0.80                | 0.87 | 2.11     | 2.28 | 224.10                                  | 111.50 | 564.50   | 502.70 | 260.90                                                     | 108.80 | 333.00   | 974.40 |
| 28    | US-TRI 15 | 18.96   | 4.04 | 38.77    | 32.58 | 8.10                  | 0.94 | 17.34    | 11.33 | 1.27                | 0.60 | 2.03     | 1.97 | 10.86                 | 3.09 | 21.43    | 21.25 | 1.45                | 1.17 | 2.52     | 2.70 | 286.70                                  | 53.40  | 702.50   | 414.00 | 229.40                                                     | 87.30  | 355.10   | 217.70 |
| 29    | US-TRI 16 | 16.54   | 3.53 | 53.22    | 35.26 | 9.27                  | 1.70 | 30.08    | 15.91 | 1.28                | 0.95 | 3.28     | 2.09 | 7.27                  | 1.83 | 23.13    | 19.36 | 0.90                | 0.56 | 2.28     | 2.13 | 355.90                                  | 122.10 | 921.80   | 667.30 | 285.80                                                     | 136.80 | 283.90   | 323.40 |
| 30    | US-TRI 19 | 14.38   | 3.62 | 39.33    | 32.17 | 8.24                  | 1.59 | 22.25    | 15.71 | 1.23                | 1.00 | 2.50     | 2.13 | 6.14                  | 2.04 | 17.08    | 16.45 | 0.89                | 0.87 | 2.15     | 1.98 | 303.20                                  | 134.90 | 615.00   | 300.80 | 249.30                                                     | 136.20 | 255.70   | 161.00 |
| 31    | US-TRI 21 | 21.14   | 5.16 | 54.95    | 51.94 | 9.64                  | 2.14 | 28.31    | 25.54 | 1.57                | 1.31 | 3.22     | 3.56 | 11.50                 | 3.02 | 26.64    | 26.40 | 1.11                | 0.88 | 2.56     | 2.85 | 285.30                                  | 163.20 | 1003.70  | 742.90 | 181.80                                                     | 127.10 | 355.60   | 208.70 |
| 32    | US-TRI 24 | 11.81   | 3.82 | 61.43    | 33.41 | 5.89                  | 1.58 | 31.83    | 17.42 | 0.86                | 0.93 | 3.57     | 2.52 | 5.92                  | 2.24 | 29.60    | 15.99 | 0.83                | 0.78 | 2.96     | 2.12 | 209.60                                  | 113.30 | 1227.40  | 648.50 | 250.90                                                     | 117.80 | 337.70   | 277.10 |
| 33    | US-TRI 25 | 11.44   | 3.78 | 38.48    | 23.04 | 4.79                  | 1.56 | 15.65    | 9.09  | 0.83                | 1.15 | 1.91     | 1.92 | 6.66                  | 2.22 | 22.83    | 13.95 | 0.97                | 0.79 | 2.32     | 2.25 | 163.50                                  | 96.50  | 490.50   | 302.50 | 193.80                                                     | 83.00  | 261.00   | 181.70 |
| 34    | US-TRI 29 | 17.24   | 3.33 | 51.84    | 25.62 | 8.44                  | 1.03 | 24.64    | 11.33 | 1.27                | 0.68 | 1.93     | 1.26 | 8.81                  | 2.30 | 27.21    | 14.30 | 0.90                | 0.85 | 1.53     | 1.70 | 281.20                                  | 58.60  | 709.20   | 297.90 | 224.00                                                     | 84.40  | 362.30   | 255.70 |
| 35    | US-TRI 39 | 18.70   | 4.54 | 72.01    | 49.15 | 8.37                  | 1.59 | 26.90    | 19.61 | 1.20                | 0.96 | 3.38     | 2.41 | 10.33                 | 2.95 | 45.11    | 29.54 | 1.41                | 0.88 | 4.42     | 3.36 | 219.60                                  | 136.40 | 795.90   | 578.10 | 184.30                                                     | 140.00 | 243.20   | 247    |

**(b) Mean of each accession for relative water content under water-sufficient (WS) and water-deficient (WD) in Trial I (n=3) and Trial II (n=4), SD=  $\pm$ standard error of the mean, % CV = % coefficient of variation.**

| Relative water content |           |          |         |          |         |          |         |         |          |         |         |
|------------------------|-----------|----------|---------|----------|---------|----------|---------|---------|----------|---------|---------|
| Entry                  | Genotype  | Trial I  |         |          |         | Trial II |         |         |          |         |         |
|                        |           | WS       |         | WD       |         | WS       |         |         | WD       |         |         |
|                        |           | 100% WHC | 20% WHC | 100% WHC | 20% WHC | 100% WHC | 50% WHC | 20% WHC | 100% WHC | 50% WHC | 20% WHC |
| 1                      | AV-TRI 2  | 90.22    | 92.68   | 85.48    | 73.32   | 90.16    | 86.76   | 87.37   | 90.71    | 86.35   | 72.31   |
| 2                      | AV-TRI 18 | 83.38    | 92.15   | 89.07    | 70.07   | 88.31    | 81.84   | 79.57   | 88.28    | 73.58   | 69.10   |
| 3                      | AV-TRI 26 | 91.33    | 91.36   | 83.49    | 47.65   | 87.55    | 90.85   | 87.11   | 88.96    | 83.26   | 72.21   |
| 4                      | AV-TRI 33 | 88.78    | 92.36   | 83.98    | 68.19   | 90.19    | 76.13   | 83.93   | 91.32    | 75.52   | 70.94   |
| 5                      | AV-TRI 34 | 93.00    | 94.12   | 92.01    | 74.17   | 91.95    | 85.78   | 84.06   | 91.80    | 80.58   | 74.63   |
| 6                      | AV-TRI 39 | 91.66    | 87.13   | 86.96    | 53.41   | 89.96    | 88.88   | 86.19   | 92.96    | 83.92   | 74.23   |
| 7                      | AV-TRI 40 | 87.30    | 92.33   | 79.36    | 62.18   | 90.30    | 78.80   | 86.04   | 89.46    | 82.79   | 73.31   |
| 8                      | AV-TRI 44 | 95.57    | 95.12   | 85.34    | 59.65   | 92.09    | 86.07   | 88.74   | 90.31    | 75.30   | 71.24   |
| 9                      | AV-TRI 49 | 92.39    | 86.80   | 91.17    | 48.66   | 88.95    | 99.70   | 90.69   | 88.38    | 91.69   | 76.76   |
| 10                     | AV-TRI 51 | 82.90    | 86.75   | 80.68    | 52.97   | 91.01    | 85.97   | 86.10   | 86.82    | 78.08   | 70.30   |
| 11                     | AV-TRI 53 | 94.11    | 97.08   | 90.59    | 49.79   | 89.91    | 89.72   | 94.17   | 91.33    | 81.82   | 80.07   |
| 12                     | AV-TRI 54 | 90.14    | 87.48   | 89.67    | 60.46   | 90.50    | 85.74   | 88.98   | 89.05    | 83.87   | 76.31   |
| 13                     | AV-TRI 56 | 93.46    | 81.48   | 86.87    | 53.92   | 89.42    | 84.98   | 86.89   | 90.61    | 79.95   | 74.36   |
| 14                     | AV-TRI 57 | 94.92    | 90.27   | 95.36    | 59.87   | 90.95    | 80.89   | 83.53   | 91.05    | 80.39   | 72.36   |
| 15                     | AV-TRI 58 | 88.87    | 92.88   | 90.08    | 62.72   | 88.61    | 80.36   | 83.45   | 88.27    | 73.54   | 72.92   |
| 16                     | AV-TRI 68 | 86.96    | 96.96   | 86.93    | 73.23   | 85.96    | 94.25   | 83.78   | 88.42    | 86.21   | 81.67   |
| 17                     | AV-TRI 69 | 92.49    | 89.77   | 85.52    | 72.56   | 88.99    | 79.72   | 85.12   | 91.66    | 80.98   | 68.06   |
| 18                     | AV-TRI 3  | 93.97    | 94.04   | 89.27    | 56.82   | 99.00    | 93.74   | 88.56   | 101.92   | 89.83   | 81.15   |
| 19                     | AV-TRI 11 | 88.47    | 86.51   | 77.92    | 45.32   | 90.00    | 81.38   | 89.23   | 88.96    | 76.19   | 71.80   |
| 20                     | AV-TRI 24 | 85.80    | 92.58   | 81.89    | 43.29   | 89.77    | 84.56   | 90.13   | 89.44    | 79.12   | 77.00   |
| 21                     | AV-TRI 31 | 88.86    | 90.09   | 90.49    | 73.38   | 91.75    | 87.55   | 88.98   | 90.17    | 85.38   | 74.35   |
| 24                     | US-TRI 3  | 88.94    | 91.91   | 91.65    | 65.46   | 91.50    | 87.80   | 86.20   | 90.50    | 84.57   | 76.46   |
| 25                     | US-TRI 6  | 94.23    | 91.95   | 96.47    | 74.83   | 86.80    | 84.85   | 90.10   | 87.89    | 87.43   | 79.61   |
| 26                     | US-TRI 13 | 90.71    | 87.72   | 83.86    | 78.22   | 91.63    | 88.06   | 78.89   | 90.13    | 81.42   | 71.35   |
| 27                     | US-TRI 14 | 91.38    | 93.52   | 85.85    | 60.27   | 88.98    | 86.99   | 83.30   | 90.12    | 83.60   | 79.02   |
| 28                     | US-TRI 15 | 90.64    | 96.29   | 84.75    | 50.97   | 90.59    | 84.13   | 87.82   | 90.84    | 77.59   | 68.65   |
| 29                     | US-TRI 16 | 89.45    | 88.18   | 85.59    | 65.86   | 87.34    | 96.45   | 86.58   | 90.17    | 92.63   | 84.54   |
| 30                     | US-TRI 19 | 89.84    | 86.50   | 89.01    | 86.17   | 89.95    | 85.44   | 90.50   | 91.33    | 81.41   | 77.81   |
| 31                     | US-TRI 21 | 87.95    | 90.15   | 87.12    | 52.21   | 89.36    | 92.76   | 87.64   | 90.24    | 94.00   | 85.06   |
| 32                     | US-TRI 24 | 86.13    | 88.67   | 85.77    | 65.33   | 91.83    | 85.58   | 87.62   | 91.60    | 81.15   | 76.82   |
| 33                     | US-TRI 25 | 93.57    | 92.64   | 85.43    | 59.13   | 91.05    | 89.13   | 85.56   | 91.73    | 73.90   | 68.54   |
| 34                     | US-TRI 29 | 91.32    | 92.68   | 75.91    | 49.59   | 91.78    | 87.31   | 87.82   | 92.15    | 79.53   | 71.74   |
| 35                     | US-TRI 39 | 90.17    | 82.22   | 89.05    | 78.03   | 89.52    | 91.30   | 86.81   | 90.32    | 88.26   | 83.98   |
| 36                     | US-TRI 46 | 85.54    | 90.90   | 88.26    | 80.36   | 92.40    | 86.77   | 87.24   | 93.45    | 86.30   | 80.56   |
| 37                     | US-TRI 47 | 90.48    | 89.93   | 92.38    | 80.98   | 91.07    | 87.04   | 77.19   | 91.53    | 82.06   | 73.41   |
| 38                     | US-TRI 20 | 86.25    | 88.38   | 86.68    | 61.13   | 89.32    | 88.80   | 88.58   | 88.80    | 79.02   | 74.74   |
| 39                     | US-TRI 30 | 84.89    | 88.07   | 84.89    | 43.84   | 88.66    | 88.61   | 83.33   | 89.26    | 91.01   | 74.30   |
| 40                     | US-TRI 48 | 90.95    | 91.73   | 85.98    | 53.28   | 90.73    | 85.95   | 88.42   | 91.38    | 79.24   | 73.04   |
| 41                     | US-TRI 49 | 86.24    | 95.77   | 86.64    | 51.33   | 91.38    | 89.62   | 88.19   | 94.71    | 87.64   | 80.15   |
| 42                     | US-TRI 51 | 92.65    | 86.12   | 85.27    | 64.03   | 90.49    | 91.31   | 91.99   | 90.79    | 92.58   | 89.31   |
| 43                     | Local Red | 87.90    | 91.42   | 89.03    | 46.53   | 90.44    | 91.34   | 89.63   | 89.81    | 85.59   | 81.25   |
| 44                     | Local PR  | 95.36    | 91.80   | 91.05    | 50.01   | 91.08    | 82.14   | 87.02   | 91.95    | 78.85   | 79.16   |
| 45                     | EW-Thida  | 86.87    | 96.61   | 89.89    | 60.02   | 91.70    | 88.28   | 86.54   | 88.18    | 86.69   | 82.93   |
| 46                     | EW-Zeya   | 93.45    | 93.75   | 91.00    | 49.98   | 90.74    | 88.56   | 86.64   | 91.65    | 85.50   | 75.62   |
| Mean                   |           | 89.99    | 90.84   | 87.13    | 61.12   | 90.31    | 87.09   | 86.73   | 90.65    | 82.92   | 75.98   |
| SD                     |           | 3.25     | 3.63    | 4.17     | 11.39   | 2.08     | 4.63    | 3.27    | 2.35     | 5.32    | 4.99    |
| CV (%)                 |           | 3.61     | 4.00    | 4.79     | 18.64   | 2.30     | 5.32    | 3.77    | 2.59     | 6.42    | 6.57    |

**(c) Mean of each accession for chlorophyll fluorescence under water-sufficient (WS) and water-deficient (WD) in Trial I (n=3) and Trial II (n=4), SD= ±standard error of the mean, % CV = % coefficient of variation.**

| Entry  | Genotype  | Fv'/Fm'  |         |          |         |          |         |         |          |         |         | Fv/Fm    |         |         |          |         |         |
|--------|-----------|----------|---------|----------|---------|----------|---------|---------|----------|---------|---------|----------|---------|---------|----------|---------|---------|
|        |           | Trial I  |         |          |         | Trial II |         |         |          |         |         | Trial II |         |         |          |         |         |
|        |           | WS       |         | WD       |         | WS       |         |         | WD       |         |         | WS       |         |         | WD       |         |         |
|        |           | 100% WHC | 20% WHC | 100% WHC | 20% WHC | 100% WHC | 50% WHC | 20% WHC | 100% WHC | 50% WHC | 20% WHC | 100% WHC | 50% WHC | 20% WHC | 100% WHC | 50% WHC | 20% WHC |
| 1      | AV-TRI 2  | 0.63     | 0.58    | 0.61     | 0.57    | 0.56     | 0.53    | 0.57    | 0.56     | 0.53    | 0.58    | 0.7      | 0.72    | 0.67    | 0.72     | 0.71    | 0.66    |
| 2      | AV-TRI 18 | 0.65     | 0.54    | 0.61     | 0.38    | 0.58     | 0.56    | 0.53    | 0.57     | 0.51    | 0.5     | 0.73     | 0.61    | 0.61    | 0.71     | 0.61    | 0.61    |
| 3      | AV-TRI 26 | 0.67     | 0.54    | 0.64     | 0.51    | 0.51     | 0.5     | 0.54    | 0.53     | 0.47    | 0.58    | 0.68     | 0.66    | 0.64    | 0.72     | 0.64    | 0.58    |
| 4      | AV-TRI 33 | 0.67     | 0.54    | 0.63     | 0.45    | 0.55     | 0.49    | 0.53    | 0.55     | 0.49    | 0.52    | 0.7      | 0.69    | 0.56    | 0.73     | 0.7     | 0.58    |
| 5      | AV-TRI 34 | 0.62     | 0.55    | 0.62     | 0.45    | 0.5      | 0.5     | 0.49    | 0.52     | 0.52    | 0.49    | 0.72     | 0.62    | 0.63    | 0.72     | 0.64    | 0.62    |
| 6      | AV-TRI 39 | 0.62     | 0.53    | 0.61     | 0.55    | 0.54     | 0.54    | 0.49    | 0.54     | 0.54    | 0.52    | 0.7      | 0.69    | 0.64    | 0.72     | 0.67    | 0.56    |
| 7      | AV-TRI 40 | 0.65     | 0.6     | 0.65     | 0.46    | 0.52     | 0.5     | 0.47    | 0.53     | 0.54    | 0.49    | 0.75     | 0.68    | 0.63    | 0.74     | 0.67    | 0.6     |
| 8      | AV-TRI 44 | 0.66     | 0.53    | 0.66     | 0.55    | 0.55     | 0.48    | 0.51    | 0.54     | 0.53    | 0.52    | 0.74     | 0.65    | 0.62    | 0.75     | 0.68    | 0.63    |
| 9      | AV-TRI 49 | 0.65     | 0.56    | 0.67     | 0.64    | 0.56     | 0.51    | 0.56    | 0.55     | 0.52    | 0.59    | 0.69     | 0.63    | 0.61    | 0.69     | 0.64    | 0.62    |
| 10     | AV-TRI 51 | 0.66     | 0.6     | 0.65     | 0.41    | 0.49     | 0.52    | 0.53    | 0.53     | 0.51    | 0.52    | 0.71     | 0.67    | 0.61    | 0.71     | 0.69    | 0.59    |
| 11     | AV-TRI 53 | 0.66     | 0.56    | 0.58     | 0.47    | 0.54     | 0.53    | 0.54    | 0.52     | 0.54    | 0.52    | 0.73     | 0.7     | 0.62    | 0.74     | 0.69    | 0.62    |
| 12     | AV-TRI 54 | 0.66     | 0.53    | 0.61     | 0.49    | 0.56     | 0.51    | 0.52    | 0.55     | 0.54    | 0.5     | 0.76     | 0.72    | 0.63    | 0.75     | 0.71    | 0.64    |
| 13     | AV-TRI 56 | 0.69     | 0.6     | 0.6      | 0.58    | 0.56     | 0.5     | 0.49    | 0.56     | 0.5     | 0.49    | 0.72     | 0.68    | 0.66    | 0.74     | 0.69    | 0.63    |
| 14     | AV-TRI 57 | 0.65     | 0.56    | 0.63     | 0.5     | 0.56     | 0.42    | 0.49    | 0.55     | 0.46    | 0.51    | 0.75     | 0.68    | 0.62    | 0.73     | 0.67    | 0.55    |
| 15     | AV-TRI 58 | 0.68     | 0.56    | 0.66     | 0.49    | 0.57     | 0.51    | 0.52    | 0.55     | 0.52    | 0.49    | 0.72     | 0.69    | 0.64    | 0.74     | 0.7     | 0.64    |
| 16     | AV-TRI 68 | 0.6      | 0.57    | 0.62     | 0.41    | 0.56     | 0.53    | 0.54    | 0.55     | 0.55    | 0.54    | 0.71     | 0.62    | 0.7     | 0.71     | 0.64    | 0.68    |
| 17     | AV-TRI 69 | 0.7      | 0.61    | 0.66     | 0.58    | 0.54     | 0.61    | 0.56    | 0.58     | 0.62    | 0.56    | 0.69     | 0.67    | 0.7     | 0.72     | 0.71    | 0.67    |
| 18     | AV-TRI 3  | 0.64     | 0.55    | 0.67     | 0.47    | 0.52     | 0.51    | 0.59    | 0.54     | 0.52    | 0.54    | 0.7      | 0.67    | 0.63    | 0.71     | 0.65    | 0.65    |
| 19     | AV-TRI 11 | 0.66     | 0.59    | 0.66     | 0.56    | 0.52     | 0.54    | 0.55    | 0.54     | 0.55    | 0.54    | 0.69     | 0.73    | 0.65    | 0.72     | 0.73    | 0.66    |
| 20     | AV-TRI 24 | 0.63     | 0.51    | 0.65     | 0.43    | 0.54     | 0.53    | 0.54    | 0.56     | 0.51    | 0.53    | 0.71     | 0.66    | 0.61    | 0.74     | 0.67    | 0.62    |
| 21     | AV-TRI 31 | 0.66     | 0.59    | 0.65     | 0.56    | 0.56     | 0.54    | 0.55    | 0.57     | 0.55    | 0.56    | 0.71     | 0.69    | 0.68    | 0.73     | 0.69    | 0.68    |
| 24     | US-TRI 3  | 0.67     | 0.58    | 0.63     | 0.44    | 0.53     | 0.5     | 0.51    | 0.53     | 0.52    | 0.54    | 0.74     | 0.69    | 0.65    | 0.74     | 0.69    | 0.63    |
| 25     | US-TRI 6  | 0.61     | 0.57    | 0.6      | 0.51    | 0.48     | 0.48    | 0.54    | 0.48     | 0.5     | 0.52    | 0.71     | 0.7     | 0.66    | 0.72     | 0.71    | 0.63    |
| 26     | US-TRI 13 | 0.65     | 0.55    | 0.67     | 0.51    | 0.59     | 0.53    | 0.63    | 0.59     | 0.51    | 0.61    | 0.72     | 0.69    | 0.64    | 0.73     | 0.69    | 0.62    |
| 27     | US-TRI 14 | 0.63     | 0.53    | 0.72     | 0.58    | 0.49     | 0.55    | 0.49    | 0.51     | 0.5     | 0.47    | 0.72     | 0.67    | 0.6     | 0.72     | 0.67    | 0.59    |
| 28     | US-TRI 15 | 0.62     | 0.56    | 0.63     | 0.43    | 0.54     | 0.53    | 0.54    | 0.55     | 0.52    | 0.52    | 0.74     | 0.73    | 0.66    | 0.73     | 0.72    | 0.6     |
| 29     | US-TRI 16 | 0.65     | 0.56    | 0.63     | 0.48    | 0.49     | 0.48    | 0.55    | 0.53     | 0.5     | 0.5     | 0.7      | 0.64    | 0.65    | 0.72     | 0.64    | 0.66    |
| 30     | US-TRI 19 | 0.65     | 0.55    | 0.61     | 0.47    | 0.48     | 0.52    | 0.55    | 0.52     | 0.53    | 0.5     | 0.69     | 0.63    | 0.59    | 0.68     | 0.65    | 0.57    |
| 31     | US-TRI 21 | 0.62     | 0.5     | 0.64     | 0.45    | 0.46     | 0.54    | 0.59    | 0.46     | 0.52    | 0.56    | 0.7      | 0.61    | 0.68    | 0.71     | 0.62    | 0.68    |
| 32     | US-TRI 24 | 0.64     | 0.59    | 0.63     | 0.46    | 0.59     | 0.55    | 0.56    | 0.56     | 0.56    | 0.54    | 0.75     | 0.68    | 0.62    | 0.72     | 0.66    | 0.63    |
| 33     | US-TRI 25 | 0.63     | 0.56    | 0.63     | 0.57    | 0.55     | 0.51    | 0.47    | 0.53     | 0.51    | 0.49    | 0.74     | 0.64    | 0.57    | 0.71     | 0.63    | 0.56    |
| 34     | US-TRI 29 | 0.61     | 0.51    | 0.59     | 0.32    | 0.55     | 0.44    | 0.51    | 0.53     | 0.47    | 0.48    | 0.69     | 0.66    | 0.55    | 0.72     | 0.66    | 0.57    |
| 35     | US-TRI 39 | 0.64     | 0.54    | 0.67     | 0.56    | 0.51     | 0.55    | 0.6     | 0.51     | 0.56    | 0.59    | 0.74     | 0.67    | 0.7     | 0.71     | 0.65    | 0.65    |
| 36     | US-TRI 46 | 0.66     | 0.59    | 0.65     | 0.5     | 0.51     | 0.53    | 0.59    | 0.51     | 0.54    | 0.6     | 0.74     | 0.62    | 0.63    | 0.73     | 0.65    | 0.62    |
| 37     | US-TRI 47 | 0.67     | 0.61    | 0.64     | 0.51    | 0.57     | 0.54    | 0.56    | 0.56     | 0.55    | 0.55    | 0.7      | 0.73    | 0.72    | 0.72     | 0.73    | 0.69    |
| 38     | US-TRI 20 | 0.66     | 0.56    | 0.64     | 0.44    | 0.62     | 0.57    | 0.47    | 0.6      | 0.53    | 0.49    | 0.76     | 0.76    | 0.6     | 0.74     | 0.73    | 0.58    |
| 39     | US-TRI 30 | 0.61     | 0.57    | 0.63     | 0.4     | 0.5      | 0.52    | 0.59    | 0.53     | 0.51    | 0.55    | 0.75     | 0.66    | 0.61    | 0.73     | 0.65    | 0.61    |
| 40     | US-TRI 48 | 0.66     | 0.59    | 0.62     | 0.46    | 0.58     | 0.56    | 0.58    | 0.59     | 0.56    | 0.51    | 0.77     | 0.67    | 0.65    | 0.76     | 0.67    | 0.65    |
| 41     | US-TRI 49 | 0.64     | 0.53    | 0.64     | 0.4     | 0.58     | 0.48    | 0.52    | 0.57     | 0.52    | 0.47    | 0.73     | 0.69    | 0.65    | 0.72     | 0.67    | 0.63    |
| 42     | US-TRI 51 | 0.66     | 0.57    | 0.63     | 0.43    | 0.44     | 0.53    | 0.59    | 0.51     | 0.53    | 0.58    | 0.72     | 0.61    | 0.67    | 0.73     | 0.64    | 0.68    |
| 43     | Local Red | 0.67     | 0.56    | 0.65     | 0.45    | 0.55     | 0.46    | 0.53    | 0.55     | 0.51    | 0.56    | 0.75     | 0.66    | 0.66    | 0.73     | 0.65    | 0.66    |
| 44     | Local PR  | 0.63     | 0.56    | 0.66     | 0.51    | 0.57     | 0.54    | 0.6     | 0.56     | 0.54    | 0.59    | 0.7      | 0.68    | 0.66    | 0.72     | 0.68    | 0.68    |
| 45     | EW-Thida  | 0.64     | 0.52    | 0.64     | 0.44    | 0.53     | 0.52    | 0.6     | 0.53     | 0.51    | 0.54    | 0.71     | 0.7     | 0.63    | 0.66     | 0.66    | 0.64    |
| 46     | EW-Zeya   | 0.68     | 0.61    | 0.65     | 0.57    | 0.53     | 0.56    | 0.6     | 0.55     | 0.59    | 0.56    | 0.79     | 0.7     | 0.69    | 0.76     | 0.69    | 0.71    |
| Mean   |           | 0.65     | 0.56    | 0.64     | 0.49    | 0.54     | 0.52    | 0.54    | 0.54     | 0.53    | 0.53    | 0.72     | 0.67    | 0.64    | 0.72     | 0.67    | 0.63    |
| SD     |           | 0.02     | 0.03    | 0.03     | 0.07    | 0.04     | 0.03    | 0.04    | 0.03     | 0.03    | 0.04    | 0.03     | 0.04    | 0.04    | 0.02     | 0.03    | 0.04    |
| CV (%) |           | 3.08     | 5.36    | 4.69     | 14.29   | 7.41     | 5.77    | 7.41    | 5.56     | 5.66    | 7.55    | 4.17     | 5.97    | 6.25    | 2.78     | 4.48    | 6.35    |

(c) Mean of each accession for leaf gas exchange measurement under water-sufficient (WS) and water-deficient (WD) in Trial I (n=3) and Trial II (n=4), SD=  $\pm$ standard error of the mean, % CV = % coefficient of variation.

| Entry  | Genotype  | Photosynthesis |         |          |         | Stomatal conductance |         |          |         | Intercellular [CO <sub>2</sub> ] |         |          |         | Transpiration rate |         |          |         |
|--------|-----------|----------------|---------|----------|---------|----------------------|---------|----------|---------|----------------------------------|---------|----------|---------|--------------------|---------|----------|---------|
|        |           | WS             |         | WD       |         | WS                   |         | WD       |         | WS                               |         | WD       |         | WS                 |         | WD       |         |
|        |           | 100% WHC       | 50% WHC | 100% WHC | 50% WHC | 100% WHC             | 50% WHC | 100% WHC | 50% WHC | 100% WHC                         | 50% WHC | 100% WHC | 50% WHC | 100% WHC           | 50% WHC | 100% WHC | 50% WHC |
| 1      | AV-TRI 2  | 18.45          | 22.82   | 37.33    | 12.82   | 0.09                 | 0.15    | 0.17     | 0.10    | 54.00                            | 117.50  | 78.50    | 162.40  | 2.79               | 4.26    | 4.62     | 2.72    |
| 2      | AV-TRI 18 | 21.73          | 25.16   | 37.81    | 14.50   | 0.19                 | 0.15    | 0.20     | 0.07    | 180.70                           | 111.40  | 53.80    | 35.60   | 4.23               | 4.21    | 4.51     | 2.43    |
| 3      | AV-TRI 26 | 6.40           | 21.84   | 15.14    | 19.49   | 0.04                 | 0.12    | 0.21     | 0.10    | 150.30                           | 76.80   | 261.10   | 77.10   | 1.62               | 2.85    | 6.09     | 2.34    |
| 4      | AV-TRI 33 | 20.61          | 13.97   | 39.51    | 17.91   | 0.11                 | 0.11    | 0.23     | 0.11    | 74.50                            | 151.10  | 78.70    | 104.10  | 3.51               | 2.93    | 5.43     | 3.53    |
| 5      | AV-TRI 34 | 20.53          | 20.65   | 27.55    | 22.47   | 0.12                 | 0.15    | 0.18     | 0.16    | 98.90                            | 151.90  | 110.30   | 136.50  | 3.45               | 4.24    | 4.62     | 3.44    |
| 6      | AV-TRI 39 | 18.43          | 12.28   | 33.75    | 12.82   | 0.12                 | 0.13    | 0.16     | 0.15    | 133.40                           | 202.80  | 49.60    | 223.50  | 3.61               | 3.54    | 4.01     | 3.36    |
| 7      | AV-TRI 40 | 23.93          | 28.51   | 35.52    | 13.08   | 0.16                 | 0.23    | 0.23     | 0.06    | 121.20                           | 164.90  | 110.50   | 48.30   | 3.71               | 6.03    | 5.19     | 1.76    |
| 8      | AV-TRI 44 | 13.83          | 10.27   | 20.45    | 13.37   | 0.15                 | 0.10    | 0.20     | 0.08    | 220.20                           | 181.20  | 187.70   | 136.90  | 3.44               | 2.97    | 4.53     | 2.20    |
| 9      | AV-TRI 49 | 41.71          | 20.99   | 43.21    | 22.68   | 0.31                 | 0.14    | 0.33     | 0.15    | 141.40                           | 141.10  | 143.20   | 123.70  | 6.95               | 3.40    | 7.03     | 3.38    |
| 10     | AV-TRI 51 | 28.24          | 35.66   | 35.60    | 14.90   | 0.18                 | 0.30    | 0.29     | 0.12    | 114.80                           | 168.10  | 123.00   | 138.60  | 5.11               | 7.32    | 5.69     | 3.11    |
| 11     | AV-TRI 53 | 31.80          | 28.25   | 42.45    | 21.86   | 0.19                 | 0.17    | 0.30     | 0.11    | 99.00                            | 85.30   | 124.00   | 61.20   | 3.99               | 4.19    | 5.48     | 3.43    |
| 12     | AV-TRI 54 | 44.56          | 15.71   | 29.67    | 14.16   | 0.29                 | 0.08    | 0.22     | 0.07    | 108.10                           | 67.60   | 139.90   | 40.60   | 5.77               | 2.36    | 5.46     | 1.70    |
| 13     | AV-TRI 56 | 16.39          | 18.93   | 39.63    | 23.08   | 0.10                 | 0.17    | 0.29     | 0.12    | 109.20                           | 179.20  | 138.40   | 89.10   | 3.32               | 4.82    | 6.05     | 2.92    |
| 14     | AV-TRI 57 | 18.18          | 16.29   | 34.25    | 18.22   | 0.14                 | 0.12    | 0.24     | 0.10    | 139.70                           | 138.00  | 133.90   | 95.50   | 4.07               | 3.66    | 5.56     | 2.99    |
| 15     | AV-TRI 58 | 26.07          | 19.82   | 26.93    | 24.63   | 0.16                 | 0.18    | 0.22     | 0.15    | 111.80                           | 185.40  | 169.60   | 93.40   | 4.52               | 4.81    | 5.44     | 3.63    |
| 16     | AV-TRI 68 | 8.79           | 28.02   | 35.72    | 26.51   | 0.05                 | 0.16    | 0.23     | 0.14    | 81.30                            | 87.20   | 106.10   | 40.80   | 1.72               | 4.24    | 5.24     | 3.06    |
| 17     | AV-TRI 69 | 21.52          | 8.21    | 27.11    | 11.51   | 0.09                 | 0.08    | 0.16     | 0.06    | 62.70                            | 192.90  | 93.00    | 57.40   | 2.22               | 2.55    | 4.00     | 1.66    |
| 18     | AV-TRI 3  | 12.37          | 19.03   | 37.53    | 21.38   | 0.14                 | 0.21    | 0.28     | 0.20    | 231.50                           | 216.70  | 137.70   | 99.70   | 3.63               | 5.91    | 6.06     | 4.45    |
| 19     | AV-TRI 11 | 18.42          | 27.91   | 32.23    | 24.46   | 0.12                 | 0.19    | 0.13     | 0.13    | 106.70                           | 114.40  | 27.00    | 49.60   | 3.54               | 4.83    | 2.79     | 4.48    |
| 20     | AV-TRI 24 | 23.30          | 17.98   | 44.62    | 19.35   | 0.15                 | 0.10    | 0.27     | 0.10    | 110.20                           | 69.10   | 89.00    | 57.70   | 4.10               | 3.02    | 5.52     | 2.48    |
| 21     | AV-TRI 31 | 26.25          | 18.13   | 17.69    | 27.14   | 0.14                 | 0.11    | 0.19     | 0.16    | 77.70                            | 97.80   | 225.30   | 83.10   | 3.82               | 3.19    | 4.78     | 3.82    |
| 24     | US-TRI 3  | 33.86          | 26.91   | 38.44    | 23.33   | 0.18                 | 0.19    | 0.26     | 0.14    | 62.60                            | 85.40   | 106.70   | 86.40   | 4.44               | 5.48    | 5.47     | 3.29    |
| 25     | US-TRI 6  | 21.11          | 27.46   | 24.61    | 27.34   | 0.14                 | 0.15    | 0.17     | 0.16    | 131.40                           | 66.30   | 128.50   | 95.10   | 4.18               | 4.70    | 4.56     | 3.64    |
| 26     | US-TRI 13 | 22.46          | 11.89   | 32.18    | 17.20   | 0.15                 | 0.07    | 0.18     | 0.10    | 83.80                            | 99.70   | 68.80    | 67.00   | 3.51               | 2.73    | 4.53     | 2.27    |
| 27     | US-TRI 14 | 28.19          | 14.17   | 42.84    | 31.35   | 0.17                 | 0.07    | 0.27     | 0.18    | 97.20                            | 31.50   | 96.10    | 76.70   | 4.37               | 2.37    | 5.67     | 4.06    |
| 28     | US-TRI 15 | 18.51          | 13.28   | 33.45    | 17.23   | 0.09                 | 0.06    | 0.21     | 0.08    | 37.90                            | 51.60   | 89.30    | 36.20   | 2.74               | 1.65    | 5.03     | 1.91    |
| 29     | US-TRI 16 | 29.29          | 17.50   | 35.65    | 19.71   | 0.17                 | 0.08    | 0.25     | 0.13    | 80.90                            | 42.00   | 130.80   | 89.20   | 5.16               | 2.21    | 6.33     | 2.81    |
| 30     | US-TRI 19 | 26.35          | 17.31   | 36.19    | 14.58   | 0.24                 | 0.08    | 0.28     | 0.10    | 197.00                           | 100.80  | 149.30   | 148.90  | 5.67               | 1.95    | 6.27     | 2.72    |
| 31     | US-TRI 21 | 44.67          | 11.50   | 43.16    | 29.68   | 0.28                 | 0.09    | 0.26     | 0.15    | 95.30                            | 25.20   | 80.40    | 40.50   | 6.26               | 1.70    | 5.95     | 3.90    |
| 32     | US-TRI 24 | 23.63          | 32.25   | 23.75    | 19.38   | 0.12                 | 0.19    | 0.14     | 0.12    | 51.30                            | 85.70   | 97.90    | 92.10   | 3.09               | 4.26    | 3.40     | 3.58    |
| 33     | US-TRI 25 | 23.35          | 19.53   | 42.46    | 16.77   | 0.13                 | 0.11    | 0.25     | 0.13    | 75.70                            | 91.00   | 82.90    | 173.30  | 3.87               | 2.74    | 6.02     | 3.82    |
| 34     | US-TRI 29 | 26.89          | 21.06   | 35.22    | 9.15    | 0.17                 | 0.16    | 0.24     | 0.07    | 117.00                           | 173.30  | 120.50   | 168.50  | 4.74               | 4.04    | 5.66     | 2.19    |
| 35     | US-TRI 39 | 23.39          | 13.71   | 28.40    | 18.22   | 0.13                 | 0.09    | 0.17     | 0.12    | 90.30                            | 124.10  | 92.70    | 110.90  | 3.37               | 2.90    | 2.98     | 4.01    |
| 36     | US-TRI 46 | 29.16          | 22.24   | 38.23    | 15.61   | 0.15                 | 0.16    | 0.20     | 0.08    | 60.80                            | 142.20  | 49.50    | 69.40   | 3.55               | 4.79    | 4.47     | 2.76    |
| 37     | US-TRI 47 | 28.78          | 15.20   | 33.26    | 26.96   | 0.15                 | 0.07    | 0.17     | 0.15    | 57.80                            | 36.10   | 58.90    | 58.10   | 3.38               | 2.30    | 3.26     | 4.11    |
| 38     | US-TRI 20 | 21.29          | 25.26   | 35.17    | 13.26   | 0.12                 | 0.15    | 0.22     | 0.08    | 81.00                            | 73.80   | 99.60    | 86.60   | 3.47               | 3.57    | 4.82     | 2.59    |
| 39     | US-TRI 30 | 32.93          | 15.67   | 38.34    | 15.92   | 0.21                 | 0.10    | 0.29     | 0.12    | 102.20                           | 120.60  | 146.50   | 129.90  | 5.48               | 2.42    | 5.93     | 3.72    |
| 40     | US-TRI 48 | 33.04          | 12.24   | 39.39    | 19.61   | 0.21                 | 0.06    | 0.26     | 0.13    | 106.00                           | 80.90   | 117.60   | 113.40  | 5.79               | 1.80    | 5.87     | 3.99    |
| 41     | US-TRI 49 | 28.90          | 13.94   | 28.73    | 16.83   | 0.17                 | 0.07    | 0.18     | 0.10    | 97.00                            | 38.80   | 103.80   | 114.40  | 4.43               | 1.78    | 5.05     | 3.43    |
| 42     | US-TRI 51 | 23.40          | 12.30   | 23.40    | 18.60   | 0.17                 | 0.06    | 0.17     | 0.12    | 124.80                           | 57.80   | 124.80   | 89.90   | 4.78               | 1.43    | 4.78     | 2.97    |
| 43     | Local Red | 21.67          | 15.81   | 22.24    | 20.58   | 0.16                 | 0.08    | 0.17     | 0.14    | 154.10                           | 65.00   | 155.10   | 131.30  | 4.61               | 1.65    | 4.72     | 3.37    |
| 44     | Local PR  | 28.23          | 23.16   | 30.68    | 18.03   | 0.18                 | 0.15    | 0.18     | 0.12    | 115.10                           | 76.30   | 81.90    | 98.30   | 4.60               | 4.04    | 4.38     | 4.04    |
| 45     | EW-Thida  | 21.79          | 18.34   | 23.25    | 16.17   | 0.12                 | 0.10    | 0.14     | 0.12    | 77.90                            | 80.50   | 95.80    | 126.00  | 2.81               | 2.88    | 3.45     | 3.97    |
| 46     | EW-Zeya   | 30.32          | 17.90   | 31.06    | 17.41   | 0.20                 | 0.13    | 0.16     | 0.09    | 126.20                           | 126.00  | 55.70    | 57.60   | 3.74               | 4.32    | 2.89     | 3.31    |
| Mean   |           | 24.61          | 19.30   | 33.04    | 19.07   | 0.16                 | 0.13    | 0.22     | 0.12    | 107.97                           | 108.52  | 111.67   | 95.78   | 4.03               | 3.48    | 4.99     | 3.17    |
| SD     |           | 7.99           | 6.27    | 7.27     | 5.11    | 0.06                 | 0.05    | 0.05     | 0.03    | 42.27                            | 50.56   | 45.07    | 41.91   | 1.11               | 1.34    | 1.00     | 0.75    |
| CV (%) |           | 32.47          | 32.49   | 22.00    | 26.80   | 37.50                | 38.46   | 22.73    | 25.00   | 39.15                            | 46.59   | 40.36    | 43.76   | 27.54              | 38.51   | 20.04    | 23.66   |

(continued)

| Entry  | Genotype  | Instantaneous water use efficiency (WUE, $\mu\text{mol mol}^{-1}$ ) |         |          |         | Intrinsic water use efficiency (WUEi, $\mu\text{mol mmol}^{-1}$ ) |         |          |         | Stomatal limitation (Ls) |         |          |         |
|--------|-----------|---------------------------------------------------------------------|---------|----------|---------|-------------------------------------------------------------------|---------|----------|---------|--------------------------|---------|----------|---------|
|        |           | WS                                                                  |         | WD       |         | WS                                                                |         | WD       |         | WS                       |         | WD       |         |
|        |           | 100% WHC                                                            | 50% WHC | 100% WHC | 50% WHC | 100% WHC                                                          | 50% WHC | 100% WHC | 50% WHC | 100% WHC                 | 50% WHC | 100% WHC | 50% WHC |
| 1      | AV-TRI 2  | 6.91                                                                | 5.77    | 8.70     | 4.87    | 217.60                                                            | 157.60  | 231.80   | 133.00  | 0.86                     | 0.69    | 0.79     | 0.58    |
| 2      | AV-TRI 18 | 5.17                                                                | 6.06    | 8.87     | 6.36    | 118.50                                                            | 160.00  | 191.50   | 217.20  | 0.54                     | 0.71    | 0.86     | 0.91    |
| 3      | AV-TRI 26 | 4.24                                                                | 7.66    | 2.48     | 8.33    | 156.30                                                            | 185.60  | 71.70    | 190.50  | 0.63                     | 0.80    | 0.36     | 0.80    |
| 4      | AV-TRI 33 | 6.03                                                                | 4.68    | 7.45     | 4.48    | 185.40                                                            | 139.10  | 174.40   | 165.70  | 0.81                     | 0.61    | 0.79     | 0.73    |
| 5      | AV-TRI 34 | 5.78                                                                | 5.04    | 6.04     | 6.37    | 169.80                                                            | 136.40  | 160.20   | 146.60  | 0.74                     | 0.61    | 0.71     | 0.64    |
| 6      | AV-TRI 39 | 4.99                                                                | 3.46    | 9.31     | 6.21    | 148.80                                                            | 106.40  | 226.00   | 148.40  | 0.66                     | 0.48    | 0.87     | 0.43    |
| 7      | AV-TRI 40 | 6.03                                                                | 4.75    | 6.83     | 7.68    | 154.30                                                            | 124.40  | 156.40   | 206.80  | 0.68                     | 0.57    | 0.71     | 0.88    |
| 8      | AV-TRI 44 | 4.02                                                                | 3.63    | 5.66     | 4.91    | 95.20                                                             | 124.20  | 115.40   | 152.00  | 0.44                     | 0.54    | 0.51     | 0.65    |
| 9      | AV-TRI 49 | 6.01                                                                | 6.30    | 6.15     | 6.76    | 132.50                                                            | 148.10  | 132.00   | 154.80  | 0.61                     | 0.64    | 0.61     | 0.68    |
| 10     | AV-TRI 51 | 5.55                                                                | 4.97    | 7.36     | 4.76    | 156.00                                                            | 119.20  | 148.70   | 147.20  | 0.70                     | 0.55    | 0.67     | 0.64    |
| 11     | AV-TRI 53 | 8.11                                                                | 6.67    | 8.88     | 6.67    | 173.10                                                            | 175.20  | 145.10   | 193.30  | 0.76                     | 0.77    | 0.67     | 0.84    |
| 12     | AV-TRI 54 | 7.72                                                                | 7.04    | 5.46     | 8.50    | 153.80                                                            | 192.50  | 139.80   | 211.90  | 0.71                     | 0.83    | 0.63     | 0.90    |
| 13     | AV-TRI 56 | 4.93                                                                | 4.27    | 6.75     | 7.90    | 164.70                                                            | 119.80  | 136.90   | 199.70  | 0.72                     | 0.54    | 0.63     | 0.77    |
| 14     | AV-TRI 57 | 4.67                                                                | 4.79    | 6.25     | 6.53    | 144.70                                                            | 147.00  | 142.00   | 173.20  | 0.64                     | 0.64    | 0.64     | 0.75    |
| 15     | AV-TRI 58 | 5.82                                                                | 4.38    | 4.79     | 7.02    | 159.20                                                            | 115.80  | 122.90   | 172.60  | 0.71                     | 0.52    | 0.56     | 0.76    |
| 16     | AV-TRI 68 | 5.08                                                                | 6.59    | 7.00     | 8.05    | 185.50                                                            | 173.90  | 159.00   | 204.70  | 0.79                     | 0.77    | 0.72     | 0.89    |
| 17     | AV-TRI 69 | 9.90                                                                | 3.46    | 7.37     | 7.00    | 247.20                                                            | 114.80  | 171.80   | 197.40  | 0.84                     | 0.51    | 0.76     | 0.88    |
| 18     | AV-TRI 3  | 3.43                                                                | 3.60    | 6.29     | 5.35    | 93.20                                                             | 96.30   | 138.20   | 123.00  | 0.39                     | 0.44    | 0.63     | 0.74    |
| 19     | AV-TRI 11 | 5.60                                                                | 5.77    | 11.85    | 5.51    | 166.10                                                            | 156.70  | 249.00   | 198.20  | 0.72                     | 0.70    | 0.93     | 0.87    |
| 20     | AV-TRI 24 | 5.67                                                                | 6.92    | 8.17     | 7.88    | 161.70                                                            | 190.40  | 165.70   | 198.00  | 0.71                     | 0.82    | 0.76     | 0.85    |
| 21     | AV-TRI 31 | 7.07                                                                | 5.66    | 3.46     | 7.54    | 180.80                                                            | 171.40  | 92.30    | 178.00  | 0.80                     | 0.75    | 0.43     | 0.78    |
| 24     | US-TRI 3  | 7.63                                                                | 5.07    | 7.52     | 7.58    | 186.60                                                            | 182.10  | 157.60   | 176.50  | 0.84                     | 0.77    | 0.71     | 0.78    |
| 25     | US-TRI 6  | 5.17                                                                | 5.94    | 5.53     | 7.66    | 148.90                                                            | 186.90  | 149.50   | 170.60  | 0.66                     | 0.83    | 0.67     | 0.75    |
| 26     | US-TRI 13 | 6.41                                                                | 4.51    | 7.38     | 8.16    | 163.90                                                            | 173.20  | 190.50   | 193.50  | 0.74                     | 0.75    | 0.82     | 0.83    |
| 27     | US-TRI 14 | 6.41                                                                | 5.80    | 7.91     | 8.24    | 167.60                                                            | 215.80  | 162.50   | 180.40  | 0.74                     | 0.92    | 0.74     | 0.80    |
| 28     | US-TRI 15 | 6.76                                                                | 8.03    | 7.28     | 8.73    | 215.30                                                            | 226.10  | 170.60   | 214.60  | 0.90                     | 0.87    | 0.76     | 0.91    |
| 29     | US-TRI 16 | 5.68                                                                | 8.69    | 5.65     | 7.45    | 175.70                                                            | 231.20  | 142.00   | 196.70  | 0.79                     | 0.90    | 0.67     | 0.77    |
| 30     | US-TRI 19 | 4.33                                                                | 9.26    | 5.98     | 5.10    | 105.40                                                            | 253.10  | 131.40   | 141.00  | 0.49                     | 0.74    | 0.60     | 0.62    |
| 31     | US-TRI 21 | 7.24                                                                | 7.29    | 7.51     | 7.28    | 161.60                                                            | 196.70  | 171.90   | 210.80  | 0.74                     | 0.94    | 0.78     | 0.86    |
| 32     | US-TRI 24 | 7.69                                                                | 7.40    | 7.02     | 5.81    | 199.30                                                            | 174.10  | 170.30   | 174.80  | 0.87                     | 0.78    | 0.74     | 0.76    |
| 33     | US-TRI 25 | 6.36                                                                | 6.90    | 7.26     | 3.83    | 183.40                                                            | 176.20  | 170.10   | 123.60  | 0.80                     | 0.77    | 0.78     | 0.56    |
| 34     | US-TRI 29 | 5.71                                                                | 5.15    | 6.51     | 3.67    | 155.70                                                            | 129.10  | 149.90   | 128.60  | 0.69                     | 0.55    | 0.68     | 0.57    |
| 35     | US-TRI 39 | 6.94                                                                | 4.78    | 9.52     | 4.84    | 175.50                                                            | 181.30  | 173.20   | 187.80  | 0.77                     | 0.68    | 0.76     | 0.71    |
| 36     | US-TRI 46 | 7.96                                                                | 4.66    | 8.86     | 5.70    | 189.90                                                            | 141.90  | 192.60   | 190.40  | 0.84                     | 0.64    | 0.87     | 0.82    |
| 37     | US-TRI 47 | 8.47                                                                | 6.51    | 10.28    | 6.64    | 199.40                                                            | 212.60  | 201.50   | 192.70  | 0.85                     | 0.91    | 0.85     | 0.85    |
| 38     | US-TRI 20 | 6.11                                                                | 7.75    | 7.76     | 5.71    | 180.70                                                            | 184.50  | 163.80   | 181.00  | 0.79                     | 0.81    | 0.73     | 0.78    |
| 39     | US-TRI 30 | 6.12                                                                | 6.93    | 6.54     | 5.97    | 162.00                                                            | 178.70  | 132.50   | 187.80  | 0.73                     | 0.69    | 0.61     | 0.66    |
| 40     | US-TRI 48 | 5.86                                                                | 8.85    | 6.87     | 5.00    | 159.20                                                            | 230.30  | 150.00   | 160.70  | 0.72                     | 0.79    | 0.68     | 0.71    |
| 41     | US-TRI 49 | 6.58                                                                | 8.38    | 5.69     | 5.18    | 167.70                                                            | 212.80  | 162.70   | 161.30  | 0.74                     | 0.90    | 0.73     | 0.71    |
| 42     | US-TRI 51 | 4.71                                                                | 8.58    | 4.71     | 7.56    | 151.00                                                            | 200.80  | 151.00   | 183.90  | 0.67                     | 0.85    | 0.67     | 0.77    |
| 43     | Local Red | 4.47                                                                | 10.07   | 4.47     | 6.28    | 131.20                                                            | 219.20  | 132.70   | 151.30  | 0.60                     | 0.84    | 0.60     | 0.66    |
| 44     | Local PR  | 6.10                                                                | 7.05    | 7.20     | 4.73    | 156.50                                                            | 183.80  | 176.50   | 172.70  | 0.70                     | 0.80    | 0.78     | 0.75    |
| 45     | EW-Thida  | 8.01                                                                | 6.20    | 6.70     | 4.35    | 182.80                                                            | 184.40  | 171.90   | 153.60  | 0.80                     | 0.79    | 0.75     | 0.67    |
| 46     | EW-Zeya   | 8.16                                                                | 4.37    | 10.88    | 5.34    | 160.30                                                            | 161.50  | 194.90   | 217.30  | 0.68                     | 0.68    | 0.85     | 0.85    |
| Mean   |           | 6.17                                                                | 6.13    | 7.05     | 6.35    | 164.64                                                            | 170.25  | 160.01   | 176.45  | 0.72                     | 0.72    | 0.71     | 0.75    |
| SD     |           | 1.35                                                                | 1.67    | 1.82     | 1.38    | 29.55                                                             | 37.53   | 32.88    | 26.13   | 0.11                     | 0.13    | 0.11     | 0.11    |
| CV (%) |           | 21.88                                                               | 27.24   | 25.82    | 21.73   | 17.95                                                             | 22.04   | 20.55    | 14.81   | 15.28                    | 18.06   | 15.49    | 14.67   |

**Table S2: Mean of each accession for rewatering assessment, n=3, SD =  $\pm$ standard error of the mean.**

| Entry | Genotype  | Drought stress |      |      |      | Recovery      |               |               |
|-------|-----------|----------------|------|------|------|---------------|---------------|---------------|
|       |           | DFT            | DTW  | LWS  | DS   | DTR           | DS-1R         | DS-5R         |
| 1     | AV-TRI 2  | 1              | 6    | 3    | 3    | 5             | 2             | 0             |
| 2     | AV-TRI 18 | 3              | 2    | 3    | 1    | 2             | 5             | 9             |
| 3     | AV-TRI 26 | 3              | 3    | 3    | 1    | not recovered | not recovered | not recovered |
| 4     | AV-TRI 33 | 3              | 1    | 1    | 1    | 1             | 6             | 6             |
| 5     | AV-TRI 34 | 3              | 2    | 2    | 1    | 1             | 2             | 8             |
| 6     | AV-TRI 39 | 4              | 3    | 3    | 2    | 3             | 4             | 7             |
| 7     | AV-TRI 40 | 3              | 3    | 3    | 1    | 1             | 3             | 6             |
| 8     | AV-TRI 44 | 4              | 3    | 3    | 1    | 2             | 6             | 5             |
| 9     | AV-TRI 49 | 4              | 4    | 3    | 2    | 1             | 5             | 5             |
| 10    | AV-TRI 51 | 3              | 2    | 3    | 1    | 1             | 5             | 9             |
| 11    | AV-TRI 53 | 2              | 4    | 1    | 2    | 3             | 5             | 5             |
| 12    | AV-TRI 54 | 2              | 3    | 4    | 2    | not recovered | not recovered | not recovered |
| 13    | AV-TRI 56 | 3              | 4    | 4    | 1    | 1             | 5             | 7             |
| 14    | AV-TRI 57 | 4              | 3    | 3    | 2    | 1             | 5             | not recovered |
| 15    | AV-TRI 58 | 3              | 3    | 2    | 0    | 3             | 5             | not recovered |
| 16    | AV-TRI 68 | 3              | 4    | 2    | 1    | 1             | 0             | 0             |
| 17    | AV-TRI 69 | 3              | 3    | 3    | 1    | 2             | 6             | 8             |
| 18    | AV-TRI 3  | 3              | 5    | 0    | 2    | 3             | 5             | 0             |
| 19    | AV-TRI 11 | 4              | 2    | 4    | 1    | 1             | 2             | 3             |
| 20    | AV-TRI 24 | 1              | 3    | 4    | 4    | 1             | 3             | 6             |
| 21    | AV-TRI 31 | 4              | 4    | 2    | 3    | 2             | 3             | 3             |
| 24    | US-TRI 3  | 3              | 4    | 4    | 2    | 1             | 0             | 0             |
| 25    | US-TRI 6  | 0              | 4    | 2    | 3    | 1             | 0             | 0             |
| 26    | US-TRI 13 | 4              | 2    | 3    | 2    | 1             | 3             | 5             |
| 27    | US-TRI 14 | 1              | 3    | 3    | 1    | 1             | 0             | 1             |
| 28    | US-TRI 15 | 1              | 3    | 2    | 3    | 2             | 5             | 5             |
| 29    | US-TRI 16 | 3              | 3    | 2    | 1    | 1             | 2             | 8             |
| 30    | US-TRI 19 | 2              | 4    | 3    | 2    | 2             | 1             | 3             |
| 31    | US-TRI 21 | 4              | 3    | 2    | 1    | 1             | 4             | 6             |
| 32    | US-TRI 24 | 3              | 5    | 2    | 2    | 1             | 3             | not recovered |
| 33    | US-TRI 25 | 3              | 4    | 1    | 0    | 2             | 8             | 8             |
| 34    | US-TRI 29 | 1              | 3    | 3    | 2    | 1             | 1             | 3             |
| 35    | US-TRI 39 | 3              | 3    | 4    | 2    | 1             | 4             | 2             |
| 36    | US-TRI 46 | 3              | 3    | 2    | 2    | 2             | 4             | 9             |
| 37    | US-TRI 47 | 2              | 5    | 2    | 1    | not recovered | not recovered | not recovered |
| 38    | US-TRI 20 | 2              | 4    | 3    | 1    | 2             | 0             | 0             |
| 39    | US-TRI 30 | 3              | 3    | 3    | 2    | 1             | 4             | 0             |
| 40    | US-TRI 48 | 3              | 2    | 3    | 1    | 2             | 5             | 7             |
| 41    | US-TRI 49 | 3              | 3    | 2    | 1    | 2             | 0             | 0             |
| 42    | US-TRI 51 | 3              | 4    | 1    | 1    | 3             | 3             | 3             |
| 43    | Local Red | 4              | 4    | 4    | 3    | 1             | 0             | 0             |
| 44    | Local PR  | 4              | 5    | 2    | 2    | 1             | 2             | 2             |
| 45    | EW-Thida  | 3              | 2    | 2    | 1    | 1             | 3             | 3             |
| 46    | EW-Zeya   | 4              | 4    | 4    | 2    | 1             | 3             | 4             |
| Mean  |           | 3              | 3    | 3    | 2    | 2             | 3             | 4             |
| SD    |           | 1.01           | 1.01 | 0.97 | 0.84 | 0.89          | 2.07          | 3.09          |

**Table S3a. Correlation coefficients (R) for traits associated with water-sufficient (WS) in the bottom diagonal and water-deficient (WD) in the top diagonal for the 44 A. tricolor accessions in Trial 1 (n=3):** Leaf dry weight (LDW), 2: Leaf fresh weight (LFW), 3: (Fv'/Fm') at 20% WHC, 4: Fv'/Fm' at 100% WHC, 5: Relative water content (RWC) at 20% WHC, 6: RWC at 100% WHC, 7: Stem dry weight (SDW), 8: Stem fresh weight, (SFW), 9: Specific leaf area (SLA), 10: Total leaf area (TLA). Probability significantly different at P<0.05, P<0.01 or P<0.001.

| Pearson correlation Trial I |                       |                     |                     |                      |                       |                     |                    |                     |                     |                     |                     |                     |
|-----------------------------|-----------------------|---------------------|---------------------|----------------------|-----------------------|---------------------|--------------------|---------------------|---------------------|---------------------|---------------------|---------------------|
| Traits                      |                       | LDW                 | LFW                 | <i>Fv'/Fm'</i><br>20 | <i>Fv'/Fm'</i><br>100 | RWC 20              | RWC<br>100         | SDW                 | SFW                 | SLA                 | TLA                 | Yield               |
| 1                           | LDW                   | -                   | <u><b>0.73</b></u>  | -0.05                | -0.05                 | <u><b>-0.43</b></u> | -0.13              | <u><b>0.30</b></u>  | <u><b>0.34</b></u>  | -0.02               | <u><b>0.82</b></u>  | <u><b>0.60</b></u>  |
| 2                           | LFW                   | <u><b>0.78</b></u>  | -                   | 0.03                 | 0.05                  | -0.11               | -0.10              | 0.14                | <u><b>0.38</b></u>  | <u><b>0.29</b></u>  | <u><b>0.77</b></u>  | <u><b>0.77</b></u>  |
| 3                           | <i>Fv'/Fm'</i> 20     | <u><b>-0.26</b></u> | <u><b>-0.20</b></u> | -                    | <u><b>0.52</b></u>    | 0.08                | 0.09               | -0.10               | <u><b>-0.08</b></u> | <u><b>0.33</b></u>  | 0.16                | -0.04               |
| 4                           | <i>Fv'/Fm'</i><br>100 | <u><b>0.39</b></u>  | <u><b>0.40</b></u>  | 0.10                 | -                     | 0.07                | 0.00               | -0.08               | -0.09               | <u><b>0.42</b></u>  | <u><b>0.20</b></u>  | -0.04               |
| 5                           | RWC 20                | -0.13               | -0.03               | 0.06                 | -0.15                 | -                   | <u><b>0.22</b></u> | <u><b>-0.30</b></u> | <u><b>-0.20</b></u> | <u><b>0.19</b></u>  | <u><b>-0.24</b></u> | <u><b>-0.19</b></u> |
| 6                           | RWC 100               | 0.01                | 0.01                | 0.03                 | 0.11                  | 0.05                | -                  | <u><b>-0.21</b></u> | -0.15               | 0.11                | -0.07               | -0.16               |
| 7                           | SDW                   | <u><b>0.59</b></u>  | <u><b>0.50</b></u>  | <u><b>-0.26</b></u>  | <u><b>0.39</b></u>    | -0.14               | -0.05              | -                   | <u><b>0.82</b></u>  | -0.14               | 0.16                | <u><b>0.64</b></u>  |
| 8                           | SFW                   | <u><b>0.45</b></u>  | <u><b>0.53</b></u>  | <u><b>-0.26</b></u>  | <u><b>0.33</b></u>    | -0.09               | -0.02              | <u><b>0.87</b></u>  | -                   | -0.09               | <u><b>0.27</b></u>  | <u><b>0.89</b></u>  |
| 9                           | SLA                   | <u><b>-0.31</b></u> | -0.10               | <u><b>0.26</b></u>   | <u><b>-0.21</b></u>   | 0.04                | -0.06              | <u><b>-0.29</b></u> | <u><b>-0.30</b></u> | -                   | <u><b>0.50</b></u>  | 0.08                |
| 10                          | TLA                   | <u><b>0.81</b></u>  | <u><b>0.74</b></u>  | -0.11                | <u><b>0.27</b></u>    | -0.09               | 0.01               | <u><b>0.43</b></u>  | <u><b>0.30</b></u>  | <u><b>0.24</b></u>  | -                   | <u><b>0.57</b></u>  |
| 11                          | Yield                 | <u><b>0.71</b></u>  | <u><b>0.89</b></u>  | <u><b>-0.26</b></u>  | <u><b>0.42</b></u>    | -0.06               | 0.01               | <u><b>0.77</b></u>  | <u><b>0.86</b></u>  | <u><b>-0.22</b></u> | <u><b>0.61</b></u>  | -                   |



**Table S3b. Correlation coefficients (R) for traits associated with water-sufficient (WS) in the bottom diagonal and water-deficient (WD) in the top diagonal for the 44 A. tricolor accessions in Trial II (n=4).** 1: Intracellular CO<sub>2</sub> concentration (Ci) at 100% WHC, 2: Ci at 50% WHC, 3: Transpiration (E) at 100% WHC, 4: E at 50% WHC, 5: Stomatal conductance (Gs) at 100% WHC, 6: Gs at 50% WHC, 7: Leaf dry weight (LDW), 8: Leaf fresh weight (LFW), 9: Stomatal limitation (Ls) at 100% WHC, 10: Ls at 50% WHC, 11: Photosynthesis (Pn) at 100% WHC, 12: Pn at 50% WHC, 13: Dark-adapted quantum yield (Fv/Fm) at 20% WHC, 14: Fv/Fm at 50% WHC, 15: Fv/Fm at 100% WHC, 16: Light-adapted quantum yield (Fv'/Fm') at 20% WHC, 17: Fv'/Fm' at 50% WHC, 18: Fv'/Fm' at 100% WHC, 19: Relative water content (RWC) at 20% WHC, 20: RWC at 50% WHC, 21: RWC at 100% WHC, 22: Stem dry weight (SDW), 23: Stem fresh weight (SFW), 24: Specific leaf area (SLA), 25: Total leaf area (TLA), 26: Instantaneous water use efficiency (WUE) at 100% WHC, 27: WUE at 50% WHC, 28: Intrinsic water use efficiency (WUEi) at 100% WHC, 29: WUEi at 50% WHC. Probability significantly different at P<0.05, P<0.01 or P<0.001. Table 7. a. Correlation coefficients (R) for traits associated with water-sufficient (WS) in the bottom diagonal and water-deficient (WD) in the top diagonal for the 44 A. tricolor accessions in Trial I

**Table S3c: Correlation coefficient (r) between drought-adaptive capabilities and physiological responses.** 1: Intracellular CO<sub>2</sub> concentration (Ci) at 100% WHC, 2: Ci at 50% WHC, 3: Transpiration (E) at 100% WHC, 4: E at 50% WHC, 5: Stomatal conductance (Gs) at 100% WHC, 6: Gs at 50% WHC, 7: Leaf dry weight (LDW), 8: Leaf fresh weight (LFW), 9: Stomatal limitation (Ls) at 100% WHC, 10: Ls at 50% WHC, 11: Photosynthesis (Pn) at 100% WHC, 12: Pn at 50% WHC, 13: Dark-adapted quantum yield (Fv/Fm) at 20% WHC, 14: Fv/Fm at 50% WHC, 15: Fv/Fm at 100% WHC, 16: Light-adapted quantum yield (Fv'/Fm') at 20% WHC, 17: Fv'/Fm' at 50% WHC, 18: Fv'/Fm' at 100% WHC, 19: Relative water content (RWC) at 20% WHC, 20: RWC at 50% WHC, 21: RWC at 100% WHC, 22: Stem dry weight (SDW), 23: Stem fresh weight (SFW), 24: Specific leaf area (SLA), 25: Total leaf area (TLA), 26: Instantaneous water use efficiency (WUE) at 100% WHC, 27: WUE at 50% WHC, 28: Intrinsic water use efficiency (WUEi) at 100% WHC, 29: WUEi at 50% WHC, 30: Days to flowering (DTF), 31: Days to recover (DTR), 32: Days to wilting (DTW), 33: Drought symptoms scoring after 5 days of recovering (DS-5R), 34: Drought symptoms scoring at first day of recovering (DS-1R), LWS: Leaf wilting scoring. Probability significantly different at P<0.05, P<0.01 or P<0.001

| Pearson correlation (Re-water assessment) |       |       |                    |       |       |                    |                    |                     |       |       |       |       |       |       |       |       |                     |                     |                     |                     |       |                     |                     |       |                    |                     |       |                    |       |                     |                    |                     |                     |                    |       |
|-------------------------------------------|-------|-------|--------------------|-------|-------|--------------------|--------------------|---------------------|-------|-------|-------|-------|-------|-------|-------|-------|---------------------|---------------------|---------------------|---------------------|-------|---------------------|---------------------|-------|--------------------|---------------------|-------|--------------------|-------|---------------------|--------------------|---------------------|---------------------|--------------------|-------|
| Traits                                    | 1     | 2     | 3                  | 4     | 5     | 6                  | 7                  | 8                   | 9     | 10    | 11    | 12    | 13    | 14    | 15    | 16    | 17                  | 18                  | 19                  | 20                  | 21    | 22                  | 23                  | 24    | 25                 | 26                  | 27    | 28                 | 29    | 30                  | 31                 | 32                  | 33                  | 34                 | 35    |
| <b>30</b> Yield                           | 0.05  | -0.06 | 0.17               | 0.00  | 0.10  | 0.05               | <u><b>0.53</b></u> | <u><b>0.81</b></u>  | -0.05 | 0.06  | 0.01  | 0.03  | -0.15 | 0.11  | -0.08 | 0.10  | <u><b>-0.31</b></u> | -0.12               | <u><b>0.46</b></u>  | 0.08                | -0.05 | <u><b>0.46</b></u>  | <u><b>0.84</b></u>  | 0.00  | <u><b>0.60</b></u> | <u><b>-0.17</b></u> | -0.01 | -0.14              | -0.05 |                     |                    |                     |                     |                    |       |
| <b>31</b> DTF                             | 0.12  | 0.12  | 0.02               | 0.14  | 0.04  | 0.09               | <u><b>0.35</b></u> | <u><b>0.27</b></u>  | -0.11 | -0.12 | -0.08 | 0.02  | 0.14  | 0.07  | 0.11  | 0.03  | -0.04               | -0.07               | -0.06               | 0.00                | 0.02  | <u><b>0.20</b></u>  | 0.03                | -0.13 | <u><b>0.25</b></u> | -0.06               | -0.12 | -0.13              | -0.07 | <u><b>0.18</b></u>  |                    |                     |                     |                    |       |
| <b>32</b> DTR                             | -0.04 | -0.03 | -0.10              | -0.09 | -0.15 | -0.08              | -0.12              | <u><b>-0.21</b></u> | 0.05  | 0.03  | -0.03 | -0.07 | 0.04  | -0.03 | 0.05  | 0.07  | 0.07                | 0.09                | 0.01                | 0.02                | 0.14  | <u><b>-0.22</b></u> | <u><b>-0.21</b></u> | 0.01  | -0.13              | 0.14                | 0.06  | <u><b>0.22</b></u> | 0.12  | <u><b>-0.25</b></u> | -0.16              |                     |                     |                    |       |
| <b>33</b> DTW                             | 0.09  | 0.11  | <u><b>0.25</b></u> | 0.11  | 0.11  | <u><b>0.22</b></u> | -0.12              | 0.11                | -0.09 | -0.11 | 0.05  | 0.19  | -0.06 | -0.17 | 0.16  | -0.01 | -0.10               | -0.08               | <u><b>0.24</b></u>  | -0.02               | 0.03  | <u><b>-0.21</b></u> | -0.06               | 0.03  | 0.06               | <u><b>-0.22</b></u> | 0.00  | -0.08              | -0.17 | 0.03                | -0.10              | 0.15                |                     |                    |       |
| <b>34</b> DS-5R                           | -0.02 | 0.00  | 0.00               | -0.01 | 0.04  | -0.02              | 0.08               | -0.09               | 0.03  | -0.01 | 0.03  | 0.02  | -0.04 | 0.02  | 0.00  | -0.07 | 0.03                | 0.06                | <u><b>-0.17</b></u> | <u><b>-0.18</b></u> | -0.02 | <u><b>0.26</b></u>  | 0.03                | -0.13 | -0.11              | 0.04                | 0.04  | -0.03              | 0.05  | -0.03               | <u><b>0.18</b></u> | -0.05               | <u><b>-0.25</b></u> |                    |       |
| <b>35</b> DS-1R                           | -0.09 | 0.05  | -0.07              | 0.05  | 0.00  | 0.01               | 0.16               | -0.07               | 0.09  | -0.05 | 0.06  | -0.03 | -0.02 | 0.09  | 0.02  | 0.04  | 0.11                | 0.06                | <u><b>-0.19</b></u> | -0.10               | 0.04  | 0.18                | 0.12                | -0.14 | 0.00               | 0.15                | -0.07 | 0.09               | -0.03 | 0.04                | 0.15               | <u><b>0.38</b></u>  | -0.14               | <u><b>0.52</b></u> |       |
| <b>36</b> LWS                             | -0.07 | 0.07  | 0.03               | -0.06 | 0.09  | -0.05              | -0.07              | 0.01                | 0.06  | -0.07 | 0.12  | 0.00  | -0.08 | 0.05  | 0.04  | -0.01 | 0.10                | <u><b>0.19*</b></u> | -0.06               | -0.04               | 0.00  | 0.00                | 0.06                | 0.05  | -0.03              | 0.12                | 0.01  | 0.02               | -0.01 | 0.04                | 0.02               | <u><b>-0.29</b></u> | 0.06                | 0.11               | -0.11 |

**Table S4a: Mean comparisons of drought tolerance indices among amaranth accession.**

| Entry | Genotype  | Trial I |       |       |               |               |       |              |        |       |               | Trial II      |       |               |               |       |              |        |       |  |  |
|-------|-----------|---------|-------|-------|---------------|---------------|-------|--------------|--------|-------|---------------|---------------|-------|---------------|---------------|-------|--------------|--------|-------|--|--|
|       |           | Yp      | Ys    | DI    | GMP           | MP            | SSI   | STI          | TOL    | YSI   | Ypi           | Ysi           | DI    | GMP           | MP            | SSI   | STI          | TOL    | YSI   |  |  |
| 1     | AV-TRI 2  | 11.14a  | 3.09a | 0.20a | 5.86ab        | 7.11ab        | 0.98a | 0.14ab       | 8.05a  | 0.28a | 26.76def      | <b>17.88d</b> | 0.41a | 21.49ef       | 22.32de       | 1.09a | 0.22d        | 8.87a  | 0.66a |  |  |
| 2     | AV-TRI 18 | 18.44a  | 5.13a | 0.38a | 9.58ab        | 11.79ab       | 0.95a | 0.38ab       | 13.31a | 0.30a | 68.80ab       | 38.85a-d      | 0.68a | 51.49abc      | 53.82abc      | 1.4a  | 1.16a-d      | 29.95a | 0.57a |  |  |
| 3     | AV-TRI 26 | 18.57a  | 3.05a | 0.15a | 7.30ab        | 10.81ab       | 1.09a | 0.22ab       | 15.52a | 0.20a | 52.07a-f      | 33.60a-d      | 0.71a | 41.31a-f      | 42.84a-e      | 1.21a | 0.81a-d      | 18.47a | 0.63a |  |  |
| 4     | AV-TRI 33 | 14.44a  | 4.15a | 0.32a | 7.60ab        | 9.29ab        | 0.95a | 0.25ab       | 10.29a | 0.31a | 37.07b-f      | 30.46a-d      | 0.76a | 33.59a-f      | 33.76b-e      | -0.55 | 0.51bcd      | 6.62a  | 0.83a |  |  |
| 5     | AV-TRI 34 | 12.04a  | 5.43a | 0.65a | 7.99ab        | 8.73ab        | 0.62a | 0.29ab       | 6.61a  | 0.55a | 47.01a-f      | 29.87a-d      | 0.60a | 37.27a-f      | 38.44a-e      | 1.13a | 0.60a-d      | 17.14a | 0.65a |  |  |
| 6     | AV-TRI 39 | 15.59a  | 3.89a | 0.25a | 7.71ab        | 9.74ab        | 0.98a | 0.26ab       | 11.70a | 0.28a | 42.56a-f      | 34.37a-d      | 0.85a | 38.16a-f      | 38.46a-e      | 0.67a | 0.66a-d      | 8.19a  | 0.79a |  |  |
| 7     | AV-TRI 40 | 16.68a  | 3.94a | 0.26a | 7.94ab        | 10.31ab       | 1.01a | 0.26ab       | 12.74a | 0.26a | 41.78a-f      | 30.32a-d      | 0.77a | 34.97a-f      | 36.05a-e      | 0.77a | 0.55a-d      | 11.46a | 0.76a |  |  |
| 8     | AV-TRI 44 | 21.74a  | 5.60a | 0.35a | <b>11.01a</b> | 13.67ab       | 1.00a | 0.50ab       | 16.14a | 0.27a | 58.23a-e      | 37.96a-d      | 0.76a | 46.89a-e      | 48.10abc      | 1.06a | 0.97a-d      | 20.27a | 0.67a |  |  |
| 9     | AV-TRI 49 | 18.33a  | 5.79a | 0.54a | 10.07ab       | 12.06ab       | 0.86a | 0.42ab       | 12.54a | 0.37a | 49.57a-f      | 37.32a-d      | 0.87a | 42.88a-f      | 43.44a-e      | 0.84a | 0.83a-d      | 12.25a | 0.74a |  |  |
| 10    | AV-TRI 51 | 18.41a  | 4.15a | 0.34a | 8.31ab        | 11.28ab       | 1.00a | 0.28ab       | 14.26a | 0.27a | 44.24a-f      | 33.86a-d      | 0.85a | 38.29a-f      | 39.05a-e      | 0.55a | 0.67a-d      | 10.38a | 0.83a |  |  |
| 11    | AV-TRI 53 | 18.95a  | 4.21a | 0.24a | 8.80ab        | 11.58ab       | 1.06a | 0.33ab       | 14.75a | 0.22a | 38.93a-f      | 24.53a-d      | 0.58a | 30.05b-f      | 31.73b-e      | 0.90a | 0.39cd       | 14.39a | 0.72a |  |  |
| 12    | AV-TRI 54 | 19.76a  | 5.34a | 0.48a | 9.88ab        | 12.55ab       | 0.90a | 0.4ab        | 14.42a | 0.34a | 44.77a-f      | 31.95a-d      | 0.99a | 36.18a-f      | 38.36a-e      | 0.68a | 0.58a-d      | 12.81a | 0.79a |  |  |
| 13    | AV-TRI 56 | 12.09a  | 4.16a | 0.41a | 6.93ab        | 8.13ab        | 0.91a | 0.21ab       | 7.93a  | 0.34a | 45.12a-f      | 28.74a-d      | 0.69a | 35.02a-f      | 36.93a-e      | 1.03a | 0.54a-d      | 16.38a | 0.68a |  |  |
| 14    | AV-TRI 57 | 15.9a   | 4.10a | 0.42a | 7.65ab        | 10.00ab       | 0.83a | 0.25ab       | 11.80a | 0.39a | 64.25abc      | 29.60a-d      | 0.42a | 43.44a-f      | 46.92a-d      | 1.71a | 0.82a-d      | 34.65a | 0.47a |  |  |
| 15    | AV-TRI 58 | 15.6a   | 3.81a | 0.29a | 7.50ab        | 9.7ab         | 0.91a | 0.26ab       | 11.79a | 0.33a | 47.83a-f      | 35.62a-d      | 0.97a | 40.34a-f      | 41.72a-e      | 0.76a | 0.72a-d      | 12.21a | 0.77a |  |  |
| 16    | AV-TRI 68 | 11.74a  | 4.98a | 0.55a | 7.56ab        | 8.36ab        | 0.77a | 0.25ab       | 6.76a  | 0.44a | 46.97a-f      | 36.95a-d      | 1.18a | 40.27a-f      | 41.96a-e      | 0.11a | 0.76a-d      | 10.02a | 0.97a |  |  |
| 17    | AV-TRI 69 | 15.11a  | 3.86a | 0.25a | 7.57ab        | 9.48ab        | 0.99a | 0.25ab       | 11.25a | 0.27a | 47.43a-f      | 22.05bcd      | 0.31a | 32.26b-f      | 34.74b-e      | 1.74a | 0.47bcd      | 25.38a | 0.46a |  |  |
| 18    | AV-TRI 3  | 15.58a  | 5.79a | 0.69a | 9.13ab        | 10.68ab       | 0.81a | 0.34ab       | 9.79a  | 0.41a | 64.84abc      | 47.90abc      | 1.09a | 55.59ab       | 56.37ab       | 0.75a | 1.46ab       | 16.94a | 0.77a |  |  |
| 19    | AV-TRI 11 | 26.47a  | 5.24a | 0.29a | <b>11.45a</b> | <b>15.85a</b> | 1.09a | <b>0.56a</b> | 21.23a | 0.20a | 61.29abc      | 42.96a-d      | 0.91a | 51.28abc      | 52.12abc      | 0.96a | 1.14a-d      | 18.32a | 0.70a |  |  |
| 20    | AV-TRI 24 | 12.64a  | 5.51a | 0.58a | 8.34ab        | 9.07ab        | 0.77a | 0.28ab       | 7.13a  | 0.44a | 54.51a-e      | 41.72a-d      | 0.99a | 47.51a-d      | 48.11abc      | 0.65a | 1.01a-d      | 12.80a | 0.80a |  |  |
| 21    | AV-TRI 31 | 14.68a  | 2.98a | 0.16a | 6.55ab        | 8.83ab        | 1.08a | 0.17ab       | 11.69a | 0.21a | 46.12a-f      | 38.40a-d      | 1.02a | 41.75a-f      | 42.26a-e      | 0.49a | 0.77a-d      | 7.72a  | 0.85a |  |  |
| 24    | US-TRI 3  | 16.34a  | 4.28a | 0.44a | 7.87ab        | 10.31ab       | 0.80a | 0.27ab       | 12.06a | 0.41a | 33.58c-f      | 25.65a-d      | 0.65a | 28.96c-f      | 29.61cde      | 0.72a | 0.38cd       | 7.92a  | 0.78a |  |  |
| 25    | US-TRI 6  | 8.12a   | 1.72a | 0.32a | <b>3.13b</b>  | <b>4.92b</b>  | 0.67a | <b>0.04b</b> | 6.40a  | 0.51a | <b>19.91f</b> | 20.17bcd      | 0.70a | <b>19.71f</b> | <b>20.04e</b> | -0.43 | <b>0.17d</b> | -0.26  | 1.13a |  |  |
| 26    | US-TRI 13 | 16.32a  | 4.22a | 0.27a | 8.23ab        | 10.27ab       | 1.02a | 0.28ab       | 12.09a | 0.26a | 44.86a-f      | 26.86a-d      | 0.51a | 34.47a-f      | 35.86a-e      | 1.19a | 0.52bcd      | 18.00a | 0.63a |  |  |
| 27    | US-TRI 14 | 11.95a  | 4.02a | 0.35a | 6.87ab        | 7.99ab        | 0.88a | 0.2ab        | 7.93a  | 0.35a | 36.94b-f      | 34.87a-d      | 1.01a | 35.80a-f      | 35.91a-e      | 0.13a | 0.56a-d      | 2.07a  | 0.96a |  |  |
| 28    | US-TRI 15 | 18.96a  | 4.04a | 0.51a | 7.50ab        | 11.50ab       | 0.97a | 0.25ab       | 14.93a | 0.29a | 38.77a-f      | 32.58a-d      | 1.05a | 34.00a-f      | 35.67a-e      | 0.46a | 0.54a-d      | 6.19a  | 0.86a |  |  |
| 29    | US-TRI 16 | 16.54a  | 3.53a | 0.21a | 7.48ab        | 10.04ab       | 1.06a | 0.23ab       | 13.00a | 0.22a | 53.22a-f      | 35.26a-d      | 0.87a | 41.96a-f      | 44.24a-e      | 1.08a | 0.81a-d      | 17.95a | 0.67a |  |  |
| 30    | US-TRI 19 | 14.38a  | 3.62a | 0.27a | 6.99ab        | 9.00ab        | 0.94a | 0.21ab       | 10.76a | 0.31a | 39.33a-f      | 32.17a-d      | 0.82a | 35.42a-f      | 35.75a-e      | 0.55a | 0.55a-d      | 7.17a  | 0.83a |  |  |
| 31    | US-TRI 21 | 21.14a  | 5.16a | 0.31a | <b>10.40a</b> | 13.15ab       | 1.02a | 0.44ab       | 15.99a | 0.25a | 54.95a-e      | <b>51.94a</b> | 1.56a | 53.02abc      | 53.45abc      | 0.05a | 1.27abc      | 3.01a  | 1.02a |  |  |
| 32    | US-TRI 24 | 11.81a  | 3.82a | 0.30a | 6.69ab        | 7.82ab        | 0.90a | 0.20ab       | 7.99a  | 0.34a | 61.43abc      | 33.41a-d      | 0.56a | 45.20a-f      | 47.42a-d      | 1.51a | 0.93a-d      | 28.02a | 0.53a |  |  |
| 33    | US-TRI 25 | 11.44a  | 3.78a | 0.32a | 6.52ab        | 7.61ab        | 0.89a | 0.17ab       | 7.66a  | 0.35a | 38.48a-f      | 23.04a-d      | 0.44a | 29.59c-f      | 30.76cde      | 1.26a | 0.39cd       | 15.44a | 0.61a |  |  |
| 34    | US-TRI 29 | 17.24a  | 3.33a | 0.17a | 7.48ab        | 10.29ab       | 1.08a | 0.23ab       | 13.91a | 0.21a | 51.84a-f      | 25.62a-d      | 0.42a | 36.09a-f      | 38.73a-e      | 1.57a | 0.58a-d      | 26.22a | 0.51a |  |  |
| 35    | US-TRI 39 | 18.7a   | 4.54a | 0.34a | 8.98ab        | 11.62ab       | 0.92a | 0.35ab       | 14.16a | 0.32a | <b>72.01a</b> | 49.15ab       | 1.03a | <b>59.35a</b> | <b>60.58a</b> | 1.02a | <b>1.55a</b> | 22.86a | 0.69a |  |  |
| 36    | US-TRI 46 | 20.31a  | 3.84a | 0.18a | 8.77ab        | 12.07ab       | 1.09a | 0.31ab       | 16.47a | 0.20a | 59.18a-e      | 40.23a-d      | 0.84a | 48.65abc      | 49.71abc      | 1.05a | 1.05a-d      | 18.94a | 0.67a |  |  |
| 37    | US-TRI 47 | 7.11a   | 3.83a | 1.07a | 4.86ab        | 5.47b         | 0.15a | 0.11ab       | 3.28a  | 1.11a | 25.27ef       | 20.01cd       | 0.49a | 22.38def      | 22.64de       | 0.74a | 0.23d        | 5.26a  | 0.77a |  |  |
| 38    | US-TRI 20 | 12.02a  | 5.01a | 0.52a | 7.72ab        | 8.52ab        | 0.76  | 0.25ab       | 7.01a  | 0.45a | 40.32a-f      | 31.42a-d      | 0.75a | 35.49a-f      | 35.87a-e      | 0.69a | 0.56a-d      | 8.89a  | 0.79a |  |  |
| 39    | US-TRI 30 | 9.02a   | 3.71a | 0.41a | 5.69ab        | 6.36ab        | 0.75  | 0.13ab       | 5.31a  | 0.45a | 45.81a-f      | 33.00a-d      | 0.78a | 38.46a-f      | 39.40a-e      | 0.73a | 0.66a-d      | 12.81a | 0.78a |  |  |
| 40    | US-TRI 48 | 19.07a  | 3.05a | 0.12a | 7.59ab        | 11.06ab       | 1.15  | 0.24ab       | 16.02a | 0.16a | 46.88a-f      | 28.21a-d      | 0.52a | 36.27a-f      | 37.54a-e      | 1.26a | 0.57a-d      | 18.67a | 0.61a |  |  |
| 41    | US-TRI 49 | 15.07a  | 3.23a | 0.16a | 6.97ab        | 9.15ab        | 1.07  | 0.21ab       | 11.84a | 0.22a | 47.02a-f      | 30.27a-d      | 0.67a | 37.08a-f      | 38.65a-e      | 1.02a | 0.61a-d      | 16.76a | 0.68a |  |  |
| 42    | US-TRI 51 | 22.28a  | 5.21a | 0.32a | <b>10.61a</b> | 13.75ab       | 1.02  | 0.46ab       | 17.06a | 0.25a | 60.94abc      | 48.22abc      | 1.15a | 54.19abc      | 54.58abc      | 0.66a | 1.28abc      | 12.72a | 0.80a |  |  |
| 43    | Local Red | 14.26a  | 3.65a | 0.33a | 6.91ab        | 8.96ab        | 0.90a | 0.20ab       | 10.61a | 0.34a | 59.42a-d      | 40.89a-d      | 0.87a | 49.1abc       | 50.16abc      | 1.10a | 1.17a-d      | 18.53a | 0.66a |  |  |
| 44    | Local PR  | 15.59a  | 4.79a | 0.47a | 8.36ab        | 10.19ab       | 0.85a | 0.29ab       | 10.80a | 0.38a | 58.83a-e      | 37.62a-d      | 0.89a | 45.81a-e      | 48.22abc      | 1.00a | 0.93a-d      | 21.21a | 0.69a |  |  |
| 45    | EW-Thida  | 19.45a  | 5.03a | 0.41a | 9.59ab        | 12.24ab       | 0.94a | 0.37ab       | 14.41a | 0.31a | 44.96a-f      | 27.58a-d      | 0.69a | 34.19a-f      | 36.27a-e      | 0.76a | 0.51bcd      | 17.38a | 0.76a |  |  |
| 46    | EW-Zeya   | 13.44a  | 3.68a | 0.37a | 6.68ab        | 8.56ab        | 0.84a | 0.21ab       | 9.76a  | 0.39a | 52.67a-f      | 29.46a-d      | 0.58a | 38.53a-f      | 41.07a-e      | 1.34a | 0.65a-d      | 23.21a | 0.59a |  |  |

**Table S4b. The analysis of variance and correlation coefficient (R) for stress intensity (SI) drought resistance index (DI), geometric mean probability (GMP), mean productivity (MP), stress susceptibility index (SSI), stress tolerance index (STI), stress tolerance (TOL) and yield stability index (YSI) in Trial I (bottom diagonal) and Trial II (top diagonal).**

| Drought stress indices |                 |        |         |         |         |         |         |         |         |
|------------------------|-----------------|--------|---------|---------|---------|---------|---------|---------|---------|
|                        |                 | SI     | DI      | GMP     | MP      | SSI     | STI     | TOL     | YSI     |
|                        | <b>Trial I</b>  | 0.73   | ns      | *       | *       | ns      | *       | ns      | ns      |
|                        | <b>Trial II</b> | 0.31   | ns      | ***     | ***     | ns      | ***     | ns      | ns      |
|                        | Yp              | Ys     | DI      | GMP     | MP      | SSI     | STI     | TOL     | YSI     |
| <b>Yp</b>              | -               | 0.51** | -0.01   | 0.86**  | 0.90**  | 0.44**  | 0.84**  | 0.67**  | -0.44** |
| <b>Ys</b>              | 0.12            | -      | 0.82**  | 0.88**  | 0.83**  | -0.49** | 0.86**  | -0.29** | 0.49**  |
| <b>DI</b>              | -0.48**         | 0.61   | -       | 0.47    | 0.40**  | -0.86** | 0.45**  | -0.72** | 0.86**  |
| <b>GMP</b>             | 0.79**          | 0.68   | -0.05   | -       | .993**  | -0.03   | 0.98**  | 0.20**  | 0.03    |
| <b>MP</b>              | 0.98**          | 0.53   | -0.33** | 0.90**  | -       | 0.04    | 0.97**  | 0.29**  | -0.04   |
| <b>SSI</b>             | 0.62**          | -0.29  | -0.91** | 0.33**  | 0.53**  | -       | -0.03   | 0.91**  | 0.90**  |
| <b>STI</b>             | 0.77**          | 0.68   | -0.01   | 0.98**  | 0.88*   | 0.27**  | -       | 0.20**  | 0.03    |
| <b>TOL</b>             | 0.97**          | -0.11  | -0.62** | 0.64**  | 0.90**  | 0.69**  | 0.62**  | -       | -0.91** |
| <b>YSI</b>             | -0.62**         | 0.29   | 0.91**  | -0.33** | -0.53** | -0.80*  | -0.27** | -0.69** | -       |

Probability significantly different at P<0.05 (\*), P<0.01 (\*\*), P<0.001 (\*\*\*) or non-significant (ns).

**Table S5: PCA biplot**

| TRIAL I                  |             |             |       |       | TRIAL II                 |       |       |       |       |
|--------------------------|-------------|-------------|-------|-------|--------------------------|-------|-------|-------|-------|
| Principle component      | WS          |             | WD    |       | Principle component      | WS    |       | WD    |       |
|                          | PC1         | PC2         | PC1   | PC2   |                          | PC1   | PC2   | PC1   | PC2   |
| Latent roots             | 4.027       | 1.882       | 3.535 | 2.462 | Latent roots             | 5.07  | 4.66  | 4.55  | 3.66  |
| Percentage (%) variation | 44.75       | 20.92       | 39.28 | 27.36 | Percentage (%) variation | 29.84 | 27.42 | 26.78 | 21.53 |
| Cumulative % variation   | 44.75       | 65.67       | 39.28 | 66.64 | Cumulative % variation   | 29.84 | 57.26 | 26.78 | 48.31 |
| <b>Latent vectors</b>    |             |             |       |       | <b>Latent vectors</b>    |       |       |       |       |
| Fv_Fm_L                  | <b>0.08</b> | 0.11        | 0.01  | 0.23  | Ci                       | -0.38 | 0.10  | -0.15 | 0.46  |
| LDW                      | <b>0.44</b> | 0.16        | 0.46  | 0.10  | E                        | -0.39 | -0.06 | 0.12  | 0.26  |
| LFW                      | <b>0.43</b> | 0.33        | 0.47  | 0.21  | FvFm_D                   | -0.03 | -0.26 | -0.25 | -0.21 |
| RWC                      | -0.03       | <b>0.10</b> | -0.15 | 0.20  | FvFm_L                   | 0.05  | 0.01  | 0.01  | -0.14 |
| SDW                      | 0.35        | -0.46       | 0.16  | -0.56 | Gs                       | -0.36 | -0.03 | 0.17  | 0.25  |
| SFW                      | 0.32        | -0.49       | 0.25  | -0.49 | LDW                      | 0.08  | 0.39  | 0.39  | 0.09  |
| SLA                      | -0.02       | <b>0.47</b> | 0.19  | 0.40  | LFW                      | 0.10  | 0.42  | 0.36  | 0.08  |
| TLA                      | <b>0.41</b> | 0.40        | 0.46  | 0.27  | Ls                       | 0.38  | -0.10 | 0.14  | -0.47 |
| Yp                       | 0.48        | -0.10       | 0.46  | -0.24 | Pn                       | -0.21 | -0.10 | 0.21  | -0.04 |
|                          |             |             |       |       | RWC                      | 0.16  | 0.10  | 0.24  | 0.09  |
|                          |             |             |       |       | SDW                      | -0.08 | 0.32  | 0.20  | -0.01 |
|                          |             |             |       |       | SFW                      | -0.13 | 0.29  | 0.27  | -0.01 |
|                          |             |             |       |       | SLA                      | 0.06  | -0.29 | 0.00  | 0.04  |
|                          |             |             |       |       | TLA                      | 0.13  | 0.31  | 0.37  | 0.11  |
|                          |             |             |       |       | WUE                      | 0.40  | -0.07 | 0.16  | -0.34 |
|                          |             |             |       |       | WUEi                     | 0.36  | 0.02  | 0.15  | -0.46 |
|                          |             |             |       |       | Yp                       | -0.04 | 0.43  | 0.41  | 0.05  |
